# Supplementary material for: Association between Food, Beverages and Overweight/Obesity in Children and Adolescents—A Systematic Review and Meta-Analysis of Observational Studies
Source: MDPI journal article supplement (doi:10.3390/nu15030764), 2023-02-02
Supplement: s1 [file s1]

# Supplementary Materials: Association Between Food, Beverages and Overweight/Obesity in Children and Adolescents - A Systematic Review and Meta-analysis of Observational Studies

**Table S1:** Characteristics and ROB assessment of included studies

| Author (year published)    | Country                        | Age (yr)            | Sex             | Study                   | Dietary instrument                                      | Definition of high intake                                                                                                                    | Sample size | Adjustments                                                                                                                                                                              | NOS score |
|----------------------------|--------------------------------|---------------------|-----------------|-------------------------|---------------------------------------------------------|----------------------------------------------------------------------------------------------------------------------------------------------|-------------|------------------------------------------------------------------------------------------------------------------------------------------------------------------------------------------|-----------|
| Abreu (2014)[1]            | Portugal                       | 15-18y              | Both (separate) | Cross-sectional         | FFQ                                                     | <b>Ready to eat cereal:</b> ≥40 g/d (boys), ≥31 g/d (girls).<br><b>Vegetables:</b> ≥114 g/d (boys). <b>Sweets/pastries:</b> ≥57 g/d (girls). | 1209        | Age, maturation, total energy intake (kJ/kcal), low-energy reporters, dietary fiber (g/4184 kJ (1000 kcal)).                                                                             | 10        |
| Ahmed (2013)[2]            | Pakistan                       | 9-18y               | Both            | Cross-sectional         | FFQ                                                     | <b>Fruit:</b> ≥4 times per week                                                                                                              | 501         | Age, sex and socioeconomic status                                                                                                                                                        | 7         |
| Beck (2014)[3]             | US (Mexican/American children) | 8-10y               | Both            | Cross-sectional         | YAQ                                                     | <b>Soda, flavored milk, whole milk, 2% milk:</b> Additional serving of 240 ml                                                                | 319         | Age, gender, the retained beverage variables                                                                                                                                             | 7         |
| Bel-Serrat (2019)[4]       | Ireland                        | 6-10y               | Both            | Longitudinal study (FU) | FFQ                                                     | <b>Fruit:</b> Every day/most days. <b>Vegetables:</b> Every day/most days. <b>Fast food:</b> Every day. <b>Savory snacks:</b> Every day      | 1262        | Measurement round, time follow-up, age, sex, baseline z-BMI, baseline abdominal obesity status, school socioeconomic status, school location, and household ownership (rented vs. owned) | 7         |
| Chen (2021)[5]             | China                          | 6-12y               | Both            | Cross-sectional         | FFQ                                                     | <b>Vegetables:</b> highest %.<br><b>Red meat:</b> highest %                                                                                  | 12813       | Age, gender                                                                                                                                                                              | 6         |
| Choumenkovitch (2013)[6]   | US                             | 10y (3rd-6th grade) | Both            | Cross-sectional         | Block food screener (intake and portions size past 24h) | <b>Whole grain:</b> >1.5 servings/day                                                                                                        | 792         | Age, sex, race/ethnicity, physical activity, state of residence                                                                                                                          | 7         |
| Colapinto (2014)[7]        | Canada                         | 10-11y (grade 5)    | Both            | Cross-sectional         | The Harward YAQ                                         | <b>White milk:</b> ≥ 2 glasses/day. <b>Chocolate milk:</b> <1 glass/month                                                                    | 8958        | Energy intake, sex, region of residence, household income, parental education                                                                                                            | 8         |
| Cutler (2012)[8]           | US                             | 12-16y              | Both (separate) | Longitudinal study (BA) | YAQ                                                     | <b>Vegetables, fruit:</b> One quintile increase in dietary pattern factor score.                                                             | 3572        | Race/ethnicity, SES, physical activity                                                                                                                                                   | 7         |
| Denova-Gutiérrez (2008)[9] | Mexico                         | 10-19y              | Both            | Cross-sectional         | FFQ                                                     | <b>SSB:</b> >3 servings/day                                                                                                                  | 1055        | Age, gender, sexual maturation, place of residence, physical activity,                                                                                                                   | 9         |

|                           |              |              |                 |                         |                                                      |                                                                                                                                                                                                                                                                                                              |        |                                                                                                      |   |
|---------------------------|--------------|--------------|-----------------|-------------------------|------------------------------------------------------|--------------------------------------------------------------------------------------------------------------------------------------------------------------------------------------------------------------------------------------------------------------------------------------------------------------|--------|------------------------------------------------------------------------------------------------------|---|
|                           |              |              |                 |                         |                                                      |                                                                                                                                                                                                                                                                                                              |        | father's education, total caloric intake, alcohol consumption and energy derived from fat intake     |   |
| Duan (2020)[10]           | China        | 11-18y       | Both            | Cross-sectional         | Pediatric Sleep QUA-Sleep-Related Breathing Disorder | <b>Fruit:</b> >2 times/week                                                                                                                                                                                                                                                                                  | 1825   | Sex, age, birth history, parental weight, maternal weight, slowness in eating, picky eating          | 6 |
| Flores (2013)[11]         | US           | 5-6y         | Both            | Longitudinal study (FU) | Interviews (7 day record)                            | <b>SSB:</b> ≥1 times past 7 days. <b>Fruit:</b> ≥1 time past 7 days                                                                                                                                                                                                                                          | 6800   | Weighted, forward stepwise procedures used                                                           | 7 |
| Gibson (2007)[12]         | UK           | 7-18y        | Both            | Cross-sectional         | 7-days record (weighed)                              | <b>SSB:</b> >0.55 MJ/day                                                                                                                                                                                                                                                                                     | 1294   | Age, sex, under-reporting, dieting                                                                   | 8 |
| Govindan (2013)[13]       | US           | 10-12y       | Girls           | Cross-sectional         | The School Physical Activity and Nutrition QUA       | <b>Milk:</b> >2 servings in previous 24 hours                                                                                                                                                                                                                                                                | 848    | Covariates with p>0.10 in the univariate analysis                                                    | 8 |
| Haboush-Deloye (2021)[14] | US           | 4-6y         | Both            | Cross-sectional         | 7-day record                                         | <b>Soda:</b> Any weekly consumption                                                                                                                                                                                                                                                                          | 7814   | SES, gender, PA, screen time, feeding practice at 6 months                                           | 6 |
| Hadi (2020)[15]           | Indonesia    | 7-12y        | Both            | Cross-sectional         | FFQ                                                  | <b>Junk food:</b> >1050 kcal/d                                                                                                                                                                                                                                                                               | 488    | Calorie intake, demographic, socioeconomic factors                                                   | 8 |
| Hanley (2000)[16]         | US           | 10-19y       | Both            | Cross-sectional         | FFQ                                                  | <b>Vegetables, Junk food, Bread foods:</b> Fourth quartile ?                                                                                                                                                                                                                                                 | 242    | Age, sex                                                                                             | 7 |
| Hatami (2014)[17]         | Iran         | 10-18y       | Both            | Cross-sectional         | FFQ                                                  | <b>Fruit, vegetables, sweets/candy, soft drinks, SSB, milk, fast food, chips:</b> 5–7 times/week                                                                                                                                                                                                             | 1109   | Age, sex                                                                                             | 7 |
| Heo (2020)[18]            | US           | Mean age 16y | Both (separate) | Cross-sectional         | Youth Risk Behavior Survey                           | <b>Soda:</b> ≥2 times per day                                                                                                                                                                                                                                                                                | 13.571 | Age, Hispanic ethnicity                                                                              | 7 |
| Hirschler (2009)[19]      | Buenos Aires | 6-12y        | Both            | Cross-sectional         | Interviews (Freq. daily)                             | <b>SSB:</b> >1 glass/day. <b>Milk:</b> ≥3 glasses/day                                                                                                                                                                                                                                                        | 330    | Fruit and vegetables consumption, milk consumption, maternal educational level, socioeconomic class. | 8 |
| Huus (2009)[20]           | Sweden       | 5y           | Both            | Longitudinal study (FU) | FFQ                                                  | <b>Vegetables, fruit, pastries, cereals (porridge), fast food (fried potatoes/French fries), sweets/candy (candy, chocolate, ice-cream), cream/ crème fraiche:</b> Daily. <b>Chips:</b> 3-5 times/week. <b>Cheese:</b> 3 times/day. <b>Milk:</b> 4 times/day or more. <b>Meat (sausage):</b> 1-2 times/week. | 5032   | Known risk factors (parental BMI, parental education and heredity for diabetes)                      | 7 |
| Hwang (2020)[21]          | Korea        | 10-18y       | Both            | Cross-sectional         | 24h recall                                           | <b>SSB:</b> ≥ median consumption (boy:≥280.55 g. girl ≥210 g.) <b>Fruit/vegetable juices:</b> ≥ median consumption                                                                                                                                                                                           | 6121   | Age, sex, BMI, household income level, residential area, energy intake                               | 7 |

|                            |                                                                                                   |                     |                 |                         |                                                         |                                                                                                                                                   |       |                                                                                                                                        |    |
|----------------------------|---------------------------------------------------------------------------------------------------|---------------------|-----------------|-------------------------|---------------------------------------------------------|---------------------------------------------------------------------------------------------------------------------------------------------------|-------|----------------------------------------------------------------------------------------------------------------------------------------|----|
|                            |                                                                                                   |                     |                 |                         |                                                         | tion (boy: ≥208 g, girl: ≥187.2 g.) <b>Milk/milk products:</b> ≥ median consumption (boy: ≥249.6 g, girl: ≥212 g)                                 |       |                                                                                                                                        |    |
| Joseph (2015)[22]          | India                                                                                             | 12-16y              | Only boys       | Cross-sectional         | FFQ                                                     | <b>Fast food:</b> Daily or more than daily consumption                                                                                            | 292   | Physical activity                                                                                                                      | 5  |
| Karki (2019)[23]           | Nepal                                                                                             | 6-13y               | Both            | Cross-sectional         | School Physical and Nutrition survey 2010 (past 7 days) | <b>Soft drinks:</b> Yes. <b>Junk food:</b> ≥2 times/week                                                                                          | 575   | All independent variables                                                                                                              | 7  |
| Katzmarzyk (2016)[24]      | Australia, Brazil, Canada, China, Columbia, Finland, India, Kenya, Portugal, South Africa, UK, US | 9-11y               | Both (separate) | Cross-sectional         | FFQ (HBSC)                                              | <b>Regular soft drinks:</b> Once a day or more                                                                                                    | 6162  | Age, study site, highest parental education, meeting physical activity guidelines                                                      | 7  |
| Kollias (2011)[25]         | Greece                                                                                            | 6-13y (age-divided) | Both            | Cross-sectional         | FFQ                                                     | <b>Sweets, fast food:</b> Yes                                                                                                                     | 780   | Age                                                                                                                                    | 7  |
| Kostopoulou (2021)[26]     | Greece                                                                                            | 10-16y              | Both            | Cross-sectional         | FFQ                                                     | <b>Fast food, sweets:</b> Frequent consumption                                                                                                    | 3504  | Gender, siblings, daily meals, breakfast consumption, consumption of poor-quality food at school                                       | 7  |
| Lee (2018)[27]             | South Korea                                                                                       | 9-13y               | Both            | Longitudinal study (FU) | FFQ                                                     | <b>Fast food:</b> ≥1 times/week                                                                                                                   | 833   | Age, sex, BMI                                                                                                                          | 7  |
| Leon-Guerrero (2020)[28]   | Guam (US)                                                                                         | 2-8y                | Both            | Cross-sectional         | 2-day food log                                          | <b>SSB:</b> ≥1.09 cups/day                                                                                                                        | 634   | Community, age, sex, ethnicity                                                                                                         | 7  |
| Liu (2012)[29]             | US                                                                                                | 2-19y (age-divided) | Both            | Cross-sectional         | 24 hour dietary interview                               | <b>SSB:</b> ≥24 oz./day. <b>Whole grain:</b> ≥1 serving/day. <b>Vegetables:</b> ≥1 cup/day. <b>Fruit:</b> ≥2 cups/day. <b>Dairy:</b> ≥3 cups/day. | 14332 | Age, race/ethnicity, perceived health, household income level, reference person's education, region, survey year, total energy intake. | 10 |
| Maitland (2015)[30]        | Turk and Caicos Islands                                                                           | 10.9 (mean age)     | Both            | Cross-sectional         | FFQ                                                     | <b>Fruit, vegetables, junk food (Miscellaneous):</b> ≥2 times/day. <b>Fast food/fried food:</b> ≥1 times/day.                                     | 297   | Gender, age, nationality, number of years in the Turk and Caicos Islands                                                               | 7  |
| Marcos-Pasero (2019)[31]   | Spain                                                                                             | 6-9y                | Both            | Cross-sectional         | 48-h food record                                        | <b>Dairy:</b> Increase in number of dairy portion/day                                                                                             | 221   | Sex, age                                                                                                                               | 8  |
| Martinez-Ospina (2019)[32] | Columbia                                                                                          | 7-14y               | Both            | Cross-sectional         | FFQ (HBSC)                                              | <b>SSB:</b> >4 days/week. <b>Fat-free-milk:</b> Less than once/day or more                                                                        | 714   | Age, sex, socioeconomic status                                                                                                         | 8  |
| Matthews (2011)[33]        | US                                                                                                | 6-19y               | Both            | Cross-sectional         | FFQ                                                     | <b>Grains, vegetable, fruit, meat, dairy, junk food:</b> Highest quartile (Q4)                                                                    | 1764  | Gender, type of school, soda intake, frequency of consumption of                                                                       | 8  |

|                           |           |                             |      |                                 |                                  |                                                                                                                                                                                                                                 |       |                                                                                                                                                                                                                                             |   |
|---------------------------|-----------|-----------------------------|------|---------------------------------|----------------------------------|---------------------------------------------------------------------------------------------------------------------------------------------------------------------------------------------------------------------------------|-------|---------------------------------------------------------------------------------------------------------------------------------------------------------------------------------------------------------------------------------------------|---|
|                           |           |                             |      |                                 |                                  |                                                                                                                                                                                                                                 |       | all of the<br>other six food groups                                                                                                                                                                                                         |   |
| Mekonnen<br>(2018)[34]    | Ethiopia  | 6-12y                       | Both | Cross-sec-<br>tional            | QUA                              | <b>Fast food:</b> Yes                                                                                                                                                                                                           | 616   | Maternal level of education, hus-<br>band/partner occupation, fruit/vege-<br>table intake, mode of transport, fast<br>food intake, household wealth status,<br>watching television, type of school,<br>missing meal, physical activity, age | 7 |
| Mihirshahi<br>(2017)[35]  | Australia | 5-16y                       | Both | Cross-sec-<br>tional            | QUA                              | <b>Fast food:</b> ≥1 times/week                                                                                                                                                                                                 | 7568  | Age, sex, SES<br>tertile, residential location, cultural<br>background, meeting daily<br>physical activity recommendations<br>(60 mins daily)                                                                                               | 7 |
| Muckelbauer<br>(2016)[36] | Germany   | 8.3<br>(mean<br>age)        | Both | Longitudi-<br>nal study<br>(FU) | 24h recall QUA                   | <b>SSB:</b> Increase by 1 glass/day (1 glass=200 ml)                                                                                                                                                                            | 1987  | Baseline BMI, baseline consumption<br>of all<br>beverage categories, change in milk,<br>tea and other beverages consump-<br>tion, age, sex, migrational back-<br>ground, study arm, follow-up dura-<br>tion                                 | 9 |
| Nasreddine<br>(2014)[37]  | Lebanon   | 6-19y<br>(age-di-<br>vided) | Both | Cross-sec-<br>tional            | 24-h recall                      | <b>Bread/cereals, milk/dairy, meat, fast food,<br/>sugar/sweets, SSB:</b> High consumption (3rd tertile<br>based on percent contribution to daily energy in-<br>take)                                                           | 868   | Baseline socio-demographic,<br>lifestyle, dietary characteristics                                                                                                                                                                           | 7 |
| Nguyen (2021)[38]         | Vietnam   | 8y                          | Both | Longitudi-<br>nal study<br>(FU) | FFQ                              | <b>Milk/milk products, packaged sweets/snacks:</b><br>Highest (4th) quartile                                                                                                                                                    | 1961  | Sex, site type, wealth index, interac-<br>tion term of wealth and site type                                                                                                                                                                 | 6 |
| Nicklas (2003)[39]        | US        | 10y                         | Both | Cross-sec-<br>tional            | 24-h recall                      | <b>Vegetables:</b> + 161 g/day. <b>Grain:</b> + 187 g/day. <b>Meat:</b><br>+60 g/day. <b>Candy:</b> +40 g/day. <b>SSB:</b> +399 g/day. <b>Salty<br/>snacks:</b> +12 g/day. <b>Milk:</b> +409 g/day. <b>Cheese:</b> 22<br>g/day. | 1562  | Total calorie intake,<br>age, study year, ethnicity, gender,<br>and ethnicity                                                                                                                                                               |   |
| Notara (2020)[40]         | Greece    | 10-12y                      | Both | Cross-sec-<br>tional            | FFQ                              | <b>Dietary fibers:</b> >15 g/1000 kcal/day                                                                                                                                                                                      | 1659  | Age, gender, breakfast consumption,<br>daily walking time, computer use,<br>parental education level, parental<br>BMI, KIDMED index                                                                                                         | 7 |
| O’Niel (2011)[41]         | US        | 2-18y                       | Both | Cross-sec-<br>tional            | 24-h dietary recall<br>interview | <b>Chocolate candy, sugar candy:</b> Consumers                                                                                                                                                                                  | 11181 | Gender, ethnicity, age, energy                                                                                                                                                                                                              | 9 |

|                        |                                                                            |                     |                 |                 |                                                        |                                                                                                      |       |                                                                                                                                         |   |
|------------------------|----------------------------------------------------------------------------|---------------------|-----------------|-----------------|--------------------------------------------------------|------------------------------------------------------------------------------------------------------|-------|-----------------------------------------------------------------------------------------------------------------------------------------|---|
| Payab (2015)[42]       | Iran                                                                       | 6-18y               | Both            | Cross-sectional | FFQ                                                    | <b>Sweets, SSB, fast food, salty snacks:</b> Daily                                                   | 13486 | Family history of chronic disease, physical activity, screen time, socio-economic status.                                               | 7 |
| Pengpid (2016)[43]     | Cambodia, Indonesia, Malaysia, Myanmar, Thailand, the Philippines, Vietnam | 13-15y              | Both (separate) | Cross-sectional | FFQ - The Global School based Student Health Survey    | <b>Fast food:</b> ≥2 times/week. <b>Fruits:</b> ≥2 servings/day. <b>Vegetables:</b> ≥3 servings/day. | 2261  | Age, country income, diet, hunger, tobacco use, active transport, sedentary behavior, psychosocial and social-familial factors          | 5 |
| Pirincci (2010)[44]    | Turkey                                                                     | 6-11y               | Both            | Cross-sectional | QUA                                                    | <b>Fast food:</b> ≥2 times/week                                                                      | 3642  | Variables with significant associations (i.e. p-value <0.05) in the bivariate logistic regressions                                      | 6 |
| Sakaki (2019)[45]      | US                                                                         | 9-16y               | Both (separate) | Cross-sectional | FFQ                                                    | <b>100% OJ consumption:</b> >1 glass/day                                                             | 1308  | Cohort, age, race, total energy intake excluding OJ, moderate/physical activity, screen time                                            | 8 |
| Sanigorski (2007)[46]  | Australia                                                                  | 4-12y               | Both            | Cross-sectional | FFQ                                                    | <b>Fruit, vegetables, fruit juice/drinks, soft drinks:</b> ≥2/day. <b>Fast food:</b> >1/week.        | 1944  | Age, gender, socio-economic status                                                                                                      | 7 |
| Santiago (2013)[47]    | Spain                                                                      | 6-12y               | Both (separate) | Cross-sectional | FFQ                                                    | <b>Fruit:</b> ≥2/day. <b>Buns, sweets:</b> ≥1/day. <b>Fast food:</b> ≥1/week.                        | 2814  | Sport activities, breakfast consumption, dietary intake (fruit, buns, fast food, sweet)                                                 | 7 |
| Shan (2010)[48]        | China                                                                      | 6-18y               | Both            | Cross-sectional | QUA                                                    | <b>SSB, fast food:</b> ≥3 times/week.                                                                | 21198 | Age, gender, Tanner stage, urban/rural residence                                                                                        | 7 |
| Shin (2017)[49]        | Korea                                                                      | 6-18y               | Both            | Cross-sectional | The Student Health Examination and Survey              | <b>Cereal (instant noodles), SSB, fast food, milk, meat:</b> Every day.                              | 3225  | Gender, survey year, school grade, food intakes/week and breakfast                                                                      | 7 |
| Siddarth (2013)[50]    | US                                                                         | 7-18y (age-divided) | Both            | Cross-sectional | FFQ                                                    | <b>Fast food:</b> ≥3 meals/week                                                                      | 1956  | Physical and sedentary activity level, sex, ethnicity, income level                                                                     | 8 |
| Valente (2011)[51]     | Portugal                                                                   | 5-10y               | Both (separate) | Cross-sectional | FFQ                                                    | <b>SSB:</b> ≥3 servings/day                                                                          | 1675  | Energy intake, parents' education level, time of sleep, questionnaire responder, total carbohydrates, sugars, MUFA, television watching | 7 |
| Vinciguerra (2019)[52] | Italy                                                                      | 6-15y               | Both            | Cross-sectional | FFQ (HBSC)                                             | <b>SSB:</b> Drinkers                                                                                 | 1702  | Gender, level of PA ST, SSB, parental risk factors                                                                                      | 7 |
| Walsh (2020)[53]       | US                                                                         | 2-12y               | Both            | Cross-sectional | The Beverage and Snack QUA - total monthly consumption | <b>Salty snacks, SSB, Sweet snacks:</b> Each additional monthly consumption                          | 300   | Child age, child sex, race, caregiver education, NFS household income, FV access, food insecurity                                       | 7 |

|                      |                                                       |       |                 |                                     |                                                |                                                                                                                              |       |                                                                                                                                                                                            |   |
|----------------------|-------------------------------------------------------|-------|-----------------|-------------------------------------|------------------------------------------------|------------------------------------------------------------------------------------------------------------------------------|-------|--------------------------------------------------------------------------------------------------------------------------------------------------------------------------------------------|---|
| White (2020)[54]     | US                                                    | 2-20y | Both            | Cross-sectional                     | Diet behavior and nutrition interview (NHANES) | <b>Milk:</b> Daily                                                                                                           | 20039 | Age, race/ethnicity, daily milk consumption, income, NHANES cycle.                                                                                                                         | 7 |
| Wijnhoven (2015)[55] | Bulgaria, Lithuania, Portugal, Sweden, Czech Republic | 6-9y  | Both            | Cross-sectional                     | FFQ (HBSC)                                     | <b>Fruit, vegetables:</b> ≥7 days/week. <b>SSB, Salty snacks, Sweets, Sweet bakery (cakes), Fast food:</b> ≥3 days/week.     | 8512  | Children's sex, age, all thirteen health-risk behaviors, children's residential urbanization grade, parental education, parental occupation, random effects for the primary sampling units | 7 |
| Xu (2016)[56]        | China                                                 | 7-12y | Both            | Cross-sectional                     | QUA                                            | <b>SSB:</b> ≥3/week                                                                                                          | 4644  | Not specified                                                                                                                                                                              | 5 |
| Xue (2016)[57]       | China                                                 | 6-18y | Both (separate) | Longitudinal study (BA - Wave 2004) | China Health and Nutritional Survey            | <b>Fast food:</b> ≥1 time in past 3 months                                                                                   | 1497  | Age, ethnicity, household income, urbanicity, geographical region and physical activity levels                                                                                             | 8 |
| Zhang (2016)[58]     | China                                                 | 7-12y | Both            | Cross-sectional                     | FFQ (past 7 days)                              | <b>Fruits, Vegetables, Meat:</b> + servings/day. <b>SSB:</b> + cups/day. <b>Fried food, Western fast food:</b> + times/week. | 3766  | Age, gender, only child or not, paternal and maternal educational level, paternal and maternal occupation, monthly household income                                                        | 7 |
| Zhang (2018)[59]     | China                                                 | 6-10y | Both            | Cross-sectional                     | FFQ                                            | <b>SSB:</b> ≥1 times/day. <b>Vegetables:</b> ≥1 times/day.                                                                   | 13001 | Age, sex, sleep, outdoor activity, vegetables intake, snack intake, SSB intake                                                                                                             | 5 |
| Zhao (2017)[60]      | China                                                 | 6-16y | Both            | Longitudinal study (BA)             | FFQ (past 3 months)                            | <b>Fast food:</b> ≥3 times/week                                                                                              | 1626  | Child factors (age, sex, and school location) and maternal factors (BMI and education level)                                                                                               | 7 |

Characteristics of included trials. Abbreviations: NOS = Newcastle-Ottawa Scale (risk of bias and study quality assessment score); FFQ = Food Frequency Questionnaire; YAQ = Youth and Adolescents Questionnaire; SSB = Sugar-sweetened beverages; QUA = Questionnaire; HBSC = Health Behavior in School-aged Children; FU = follow-up data used for meta-analysis; BA = baseline data used for meta-analysis.

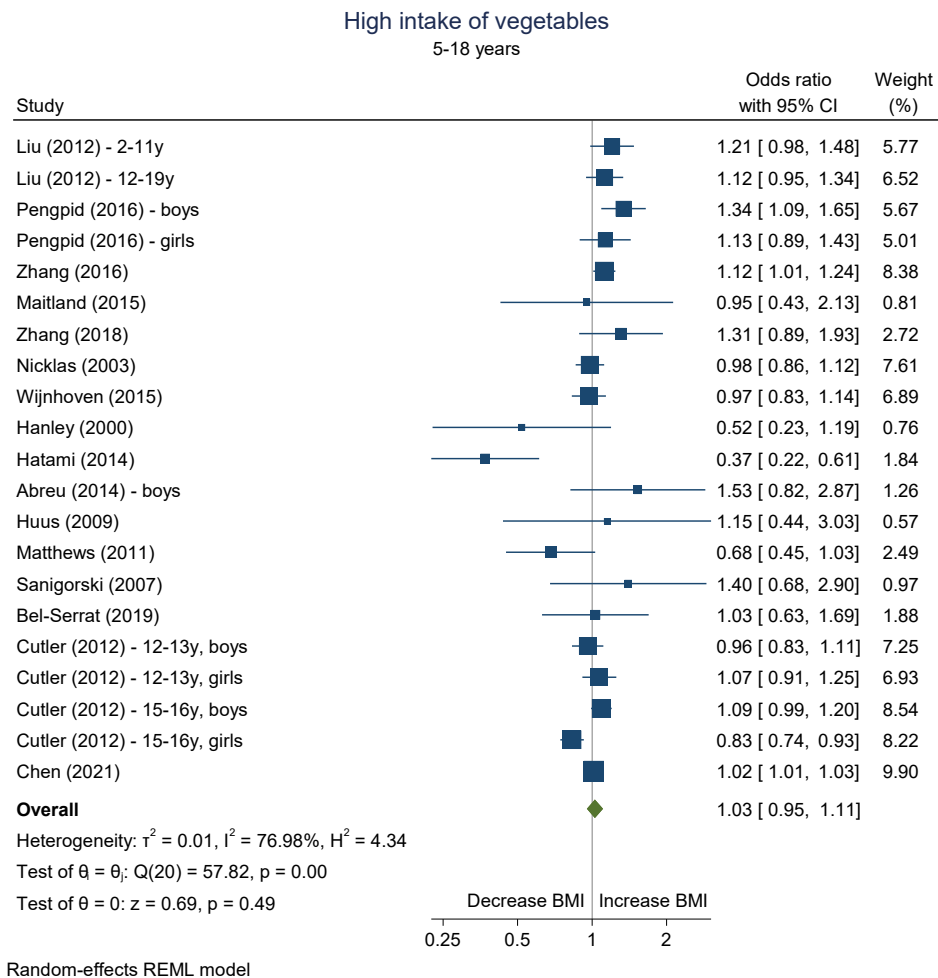

**Figure S1.** Association between a high intake of vegetables and risk of overweight/obesity in children and adolescents 5-18 years.

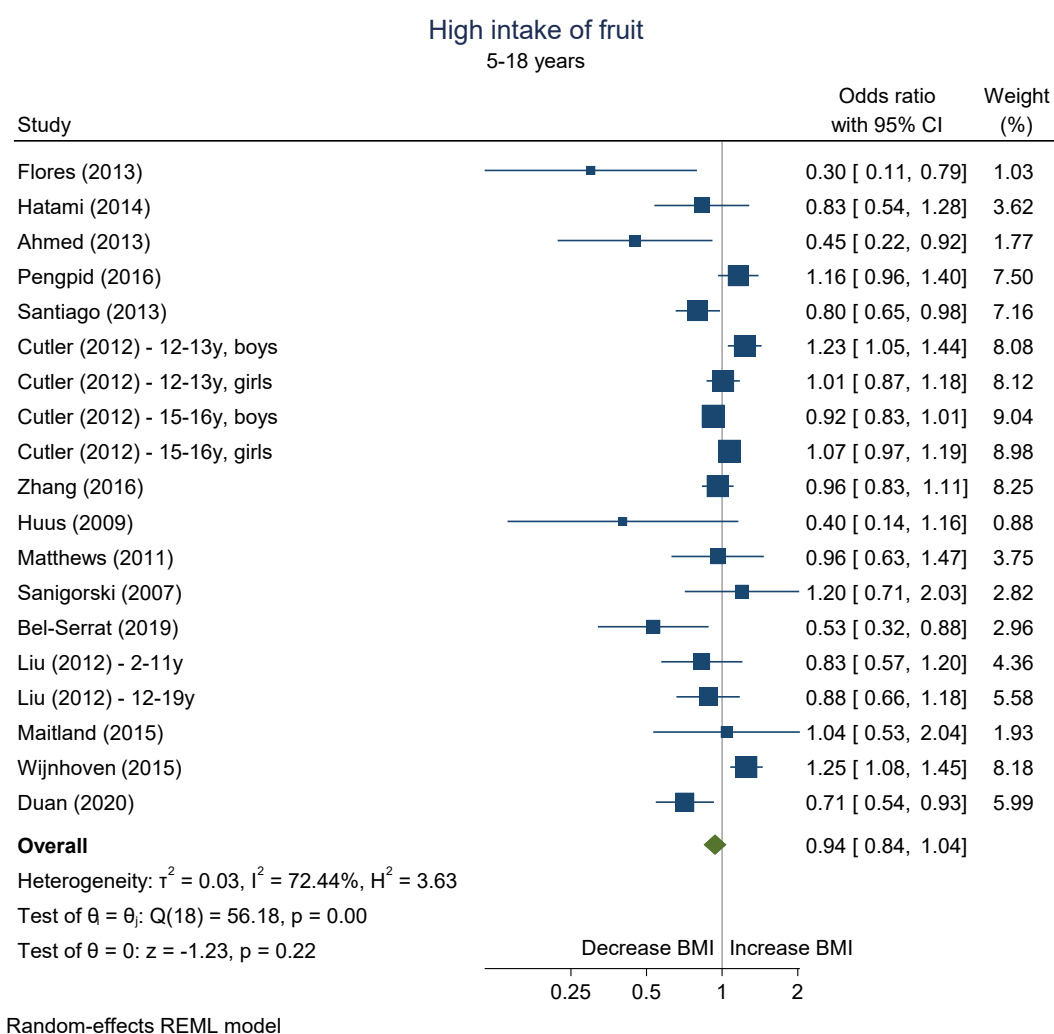

**Figure S2.** Association between a high intake of fruit and risk of overweight/obesity in children and adolescents 5-18 years.

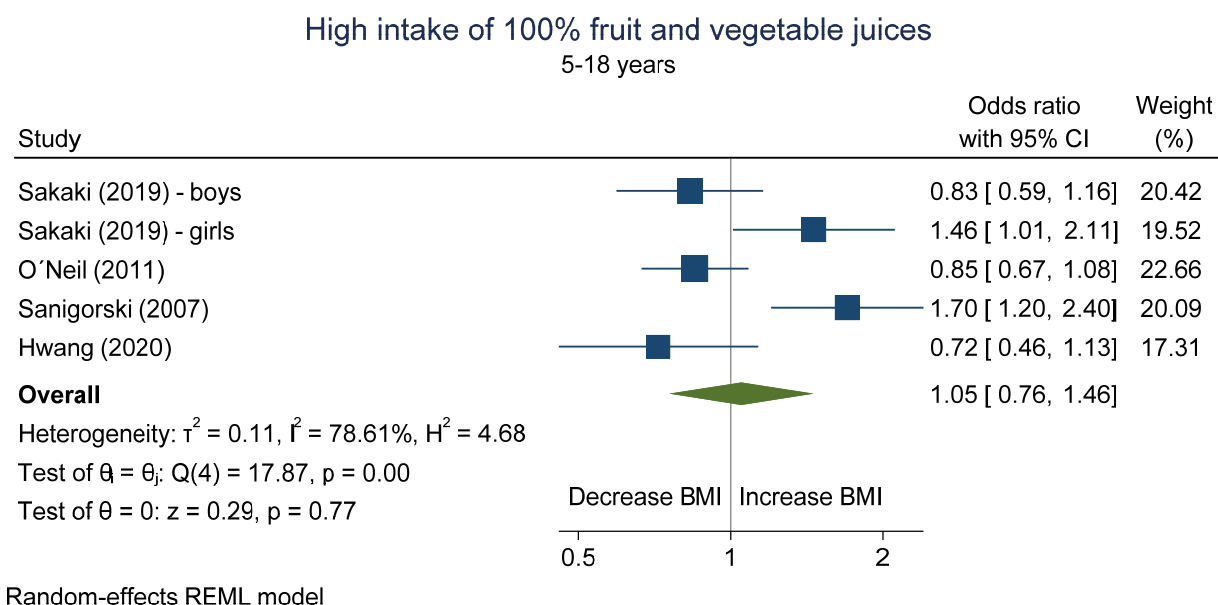

**Figure S3.** Association between a high intake of 100% fruit and vegetable juices and risk of overweight/obesity in children and adolescents 5-18 years.



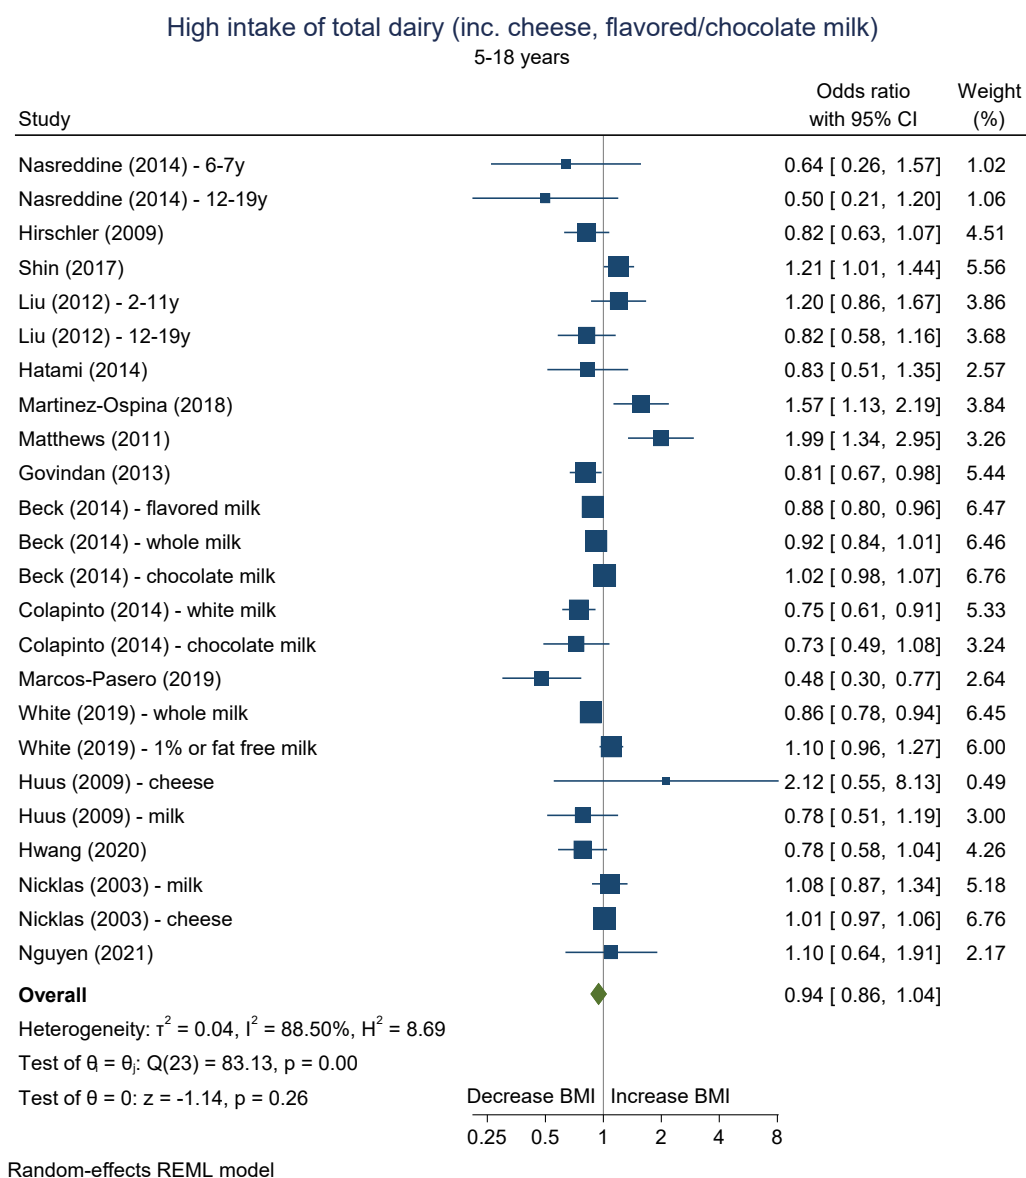

**Figure S4.** Association between a high intake of total dairy and risk of overweight/obesity in children and adolescents 5-18 years.

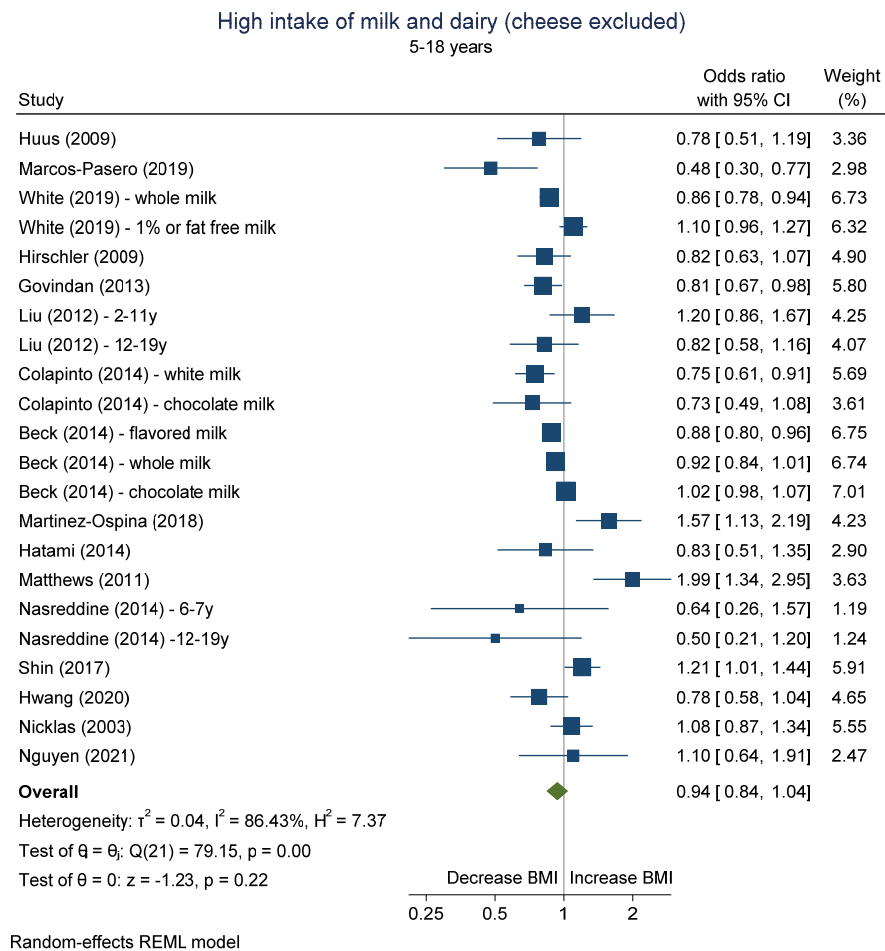

**Figure S5.** Association between a high intake of milk and dairy and risk of overweight/obesity in children and adolescents 5-18 years.

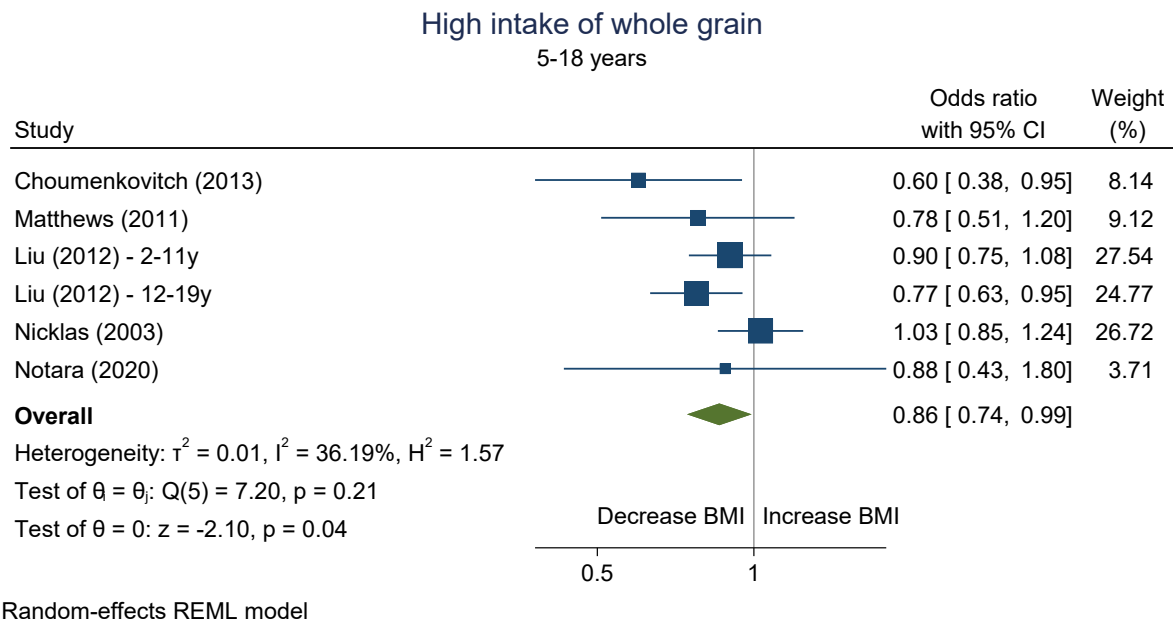

**Figure S6.** Association between a high intake of whole grain and risk of overweight/obesity in children and adolescents 5-18 years.

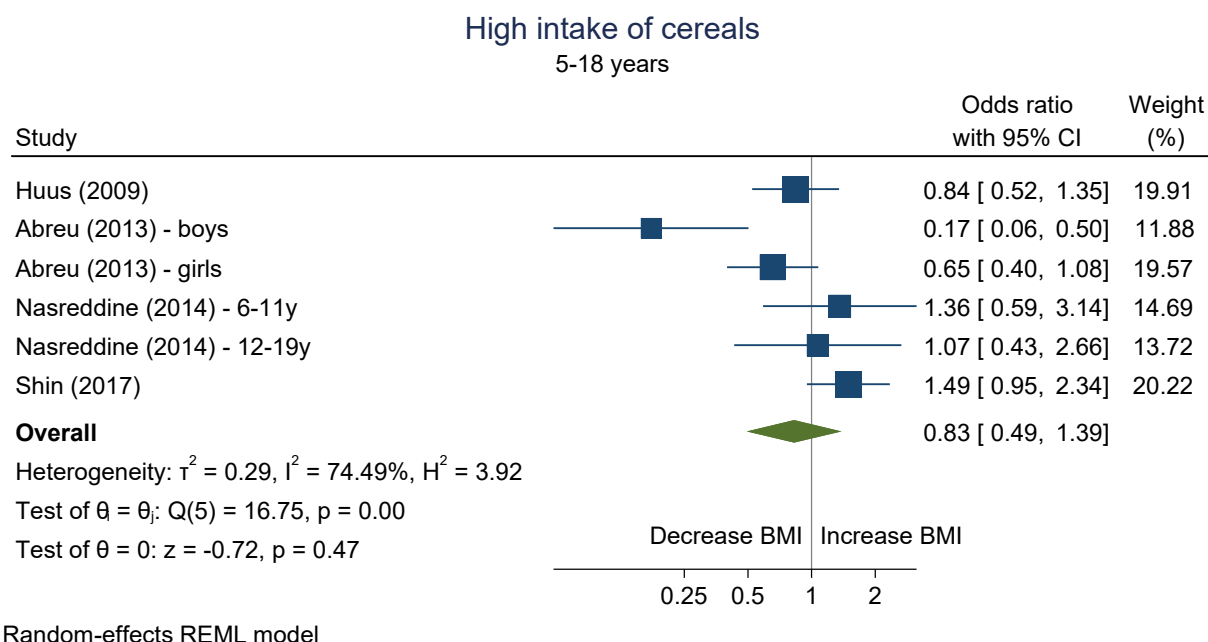

**Figure S7.** Association between a high intake of cereals and risk of overweight/obesity in children and adolescents 5-18 years.

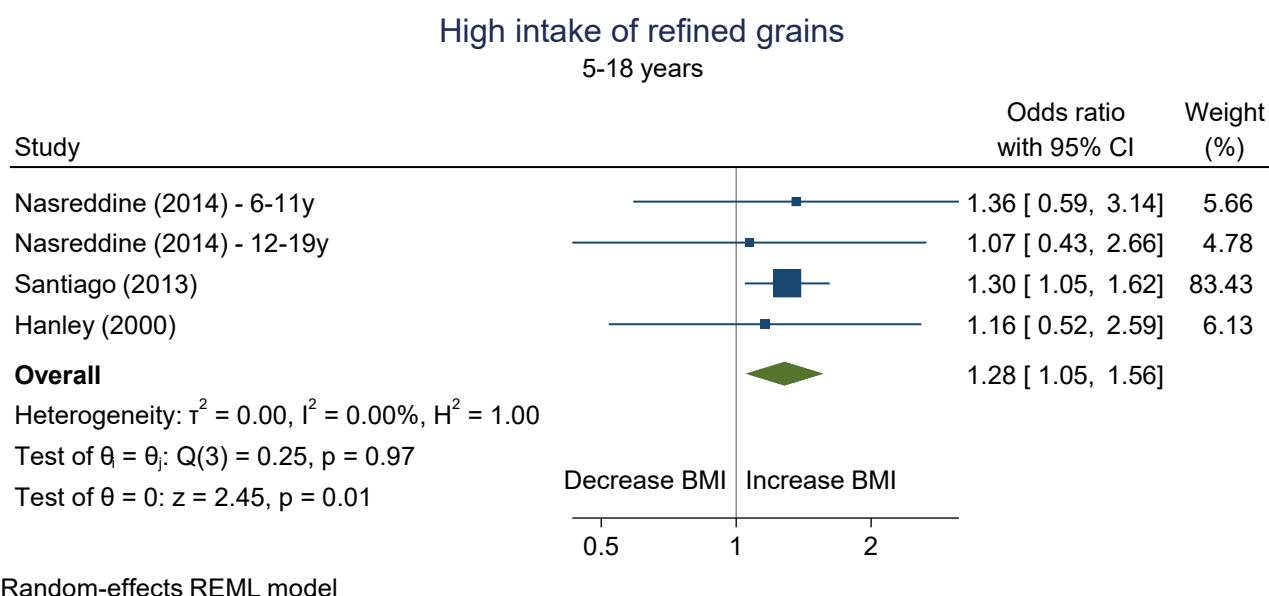

**Figure S8.** Association between a high intake of refined grains and risk of overweight/obesity in children and adolescents 5-18 years.

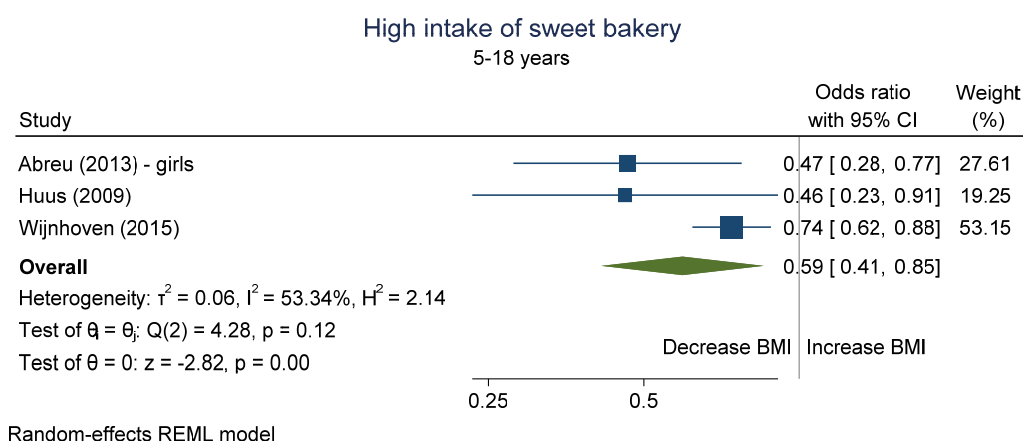

**Figure S9.** Association between a high intake of sweet bakery and risk of overweight/obesity in children and adolescents 5-18 years.

# High intake of sweets and candy 5-18 years

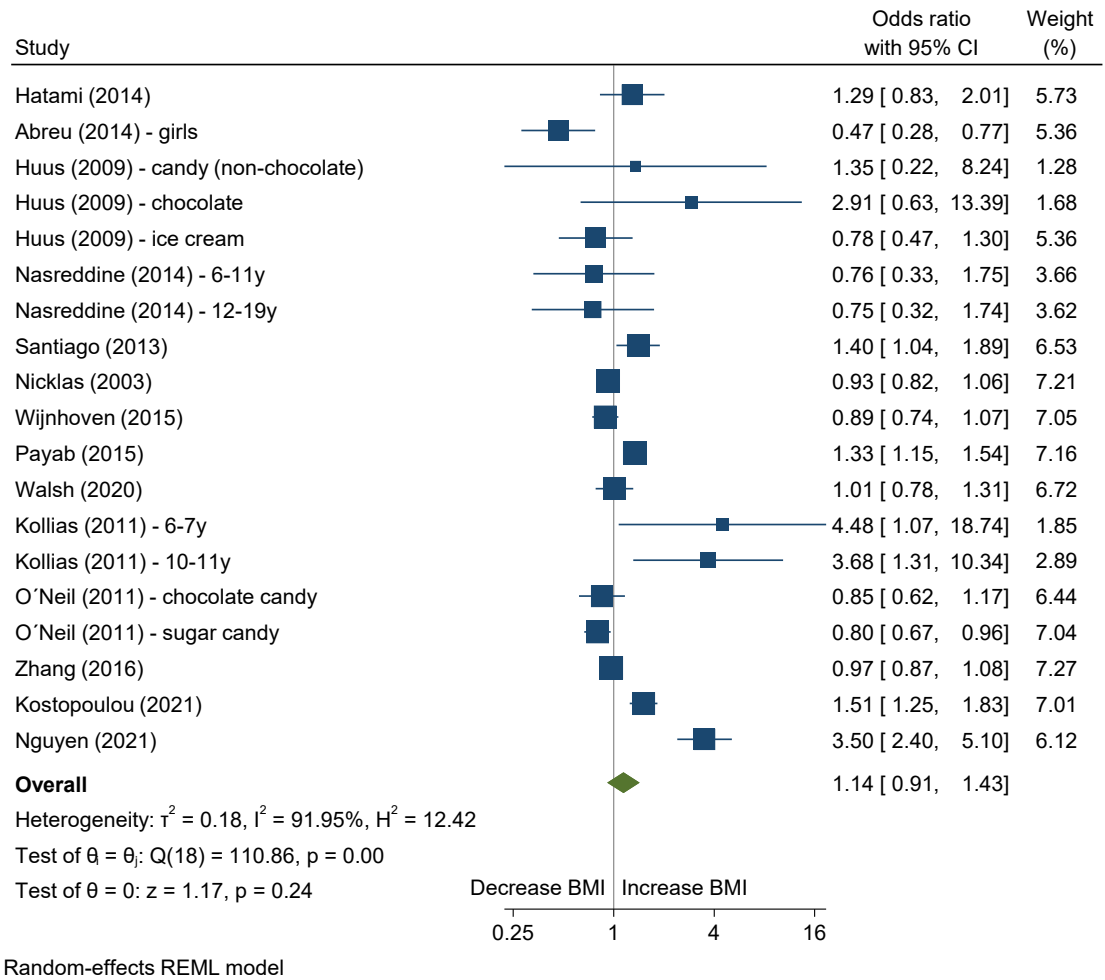

**Figure S10.** Association between a high intake of sweets and candy and risk of overweight/obesity in children and adolescents 5-18 years.

# High intake of sugar-sweetened beverages (exc. 100% fruit juice and diet drinks) 5-18 years

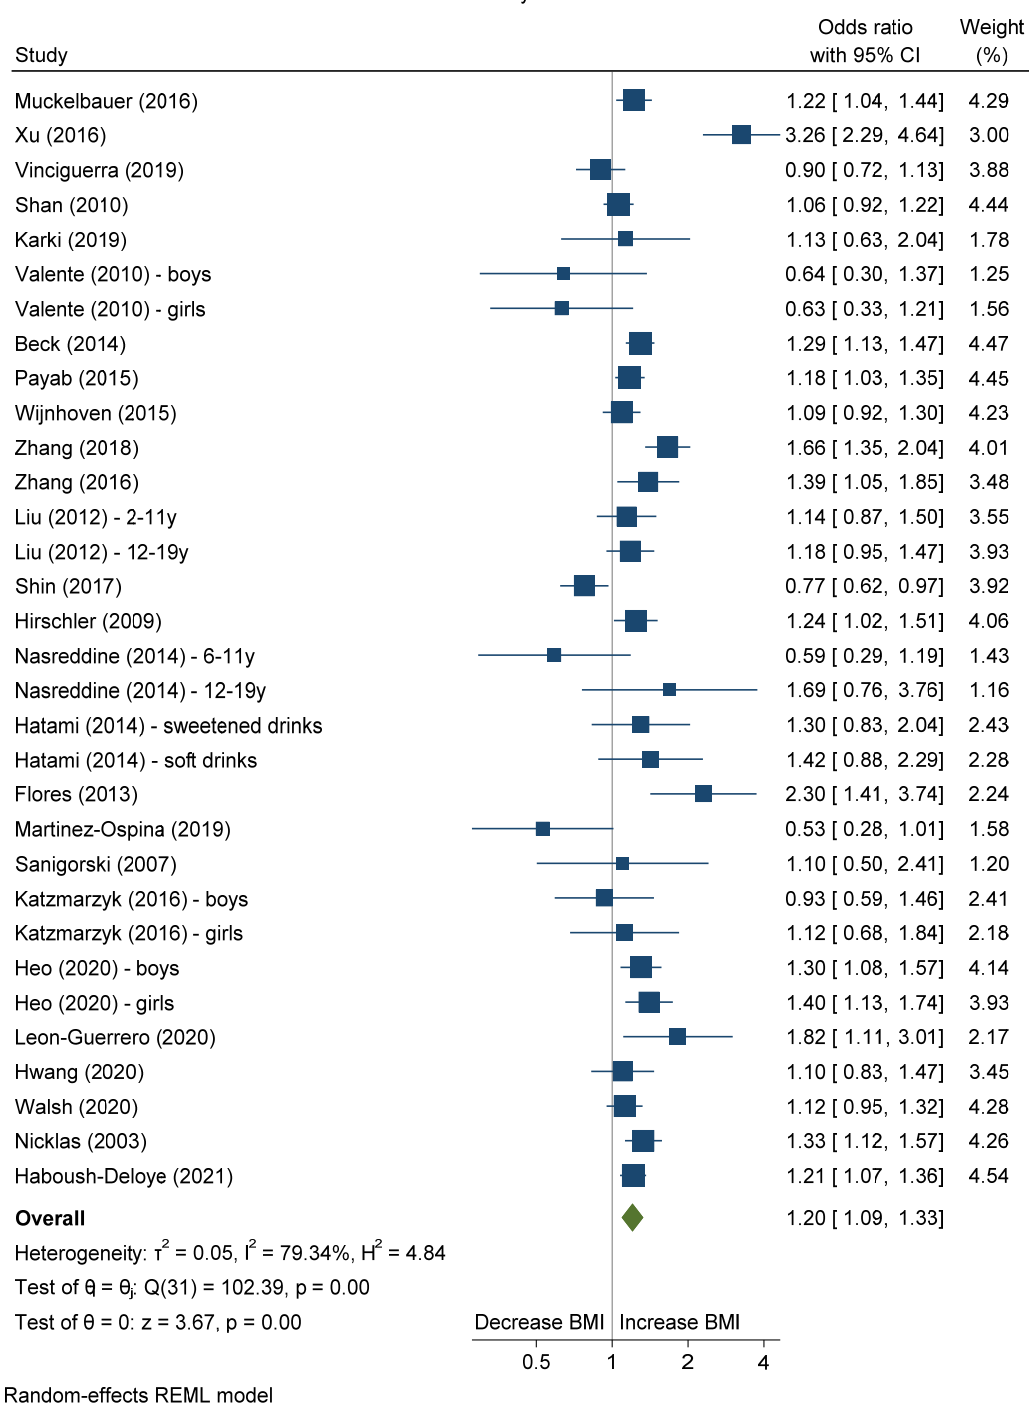

**Figure S11.** Association between a high intake of sugar-sweetened beverages and risk of overweight/obesity in children and adolescents 5-18 years.

### High intake of meat 5-18 years

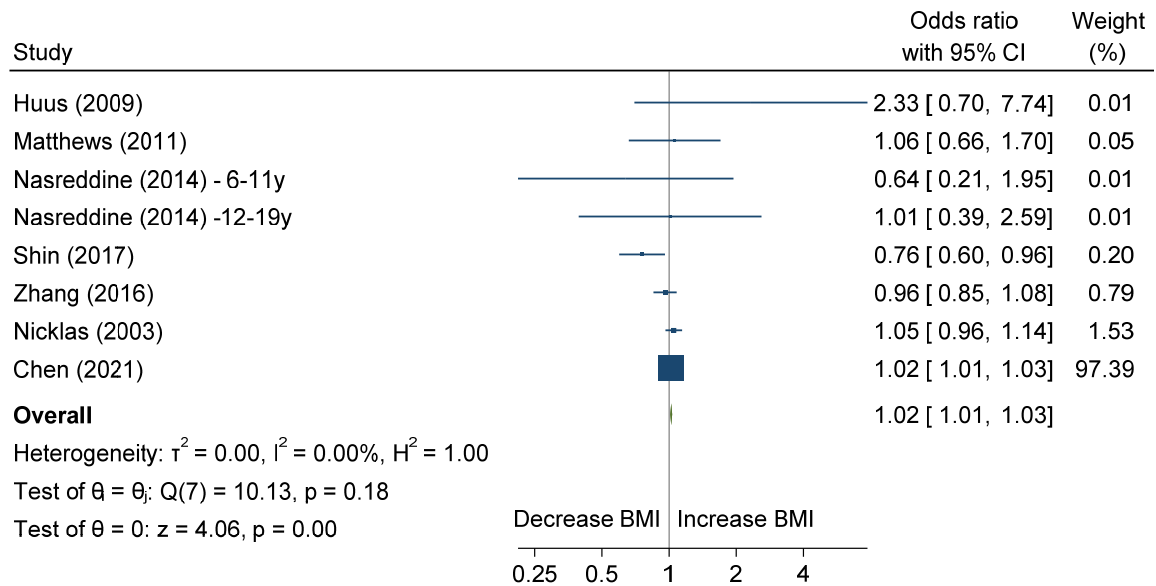

Random-effects REML model

**Figure S12.** Association between a high intake of meat and risk of overweight/obesity in children and adolescents 5-18 years.

### High intake of fast food 5-18 years

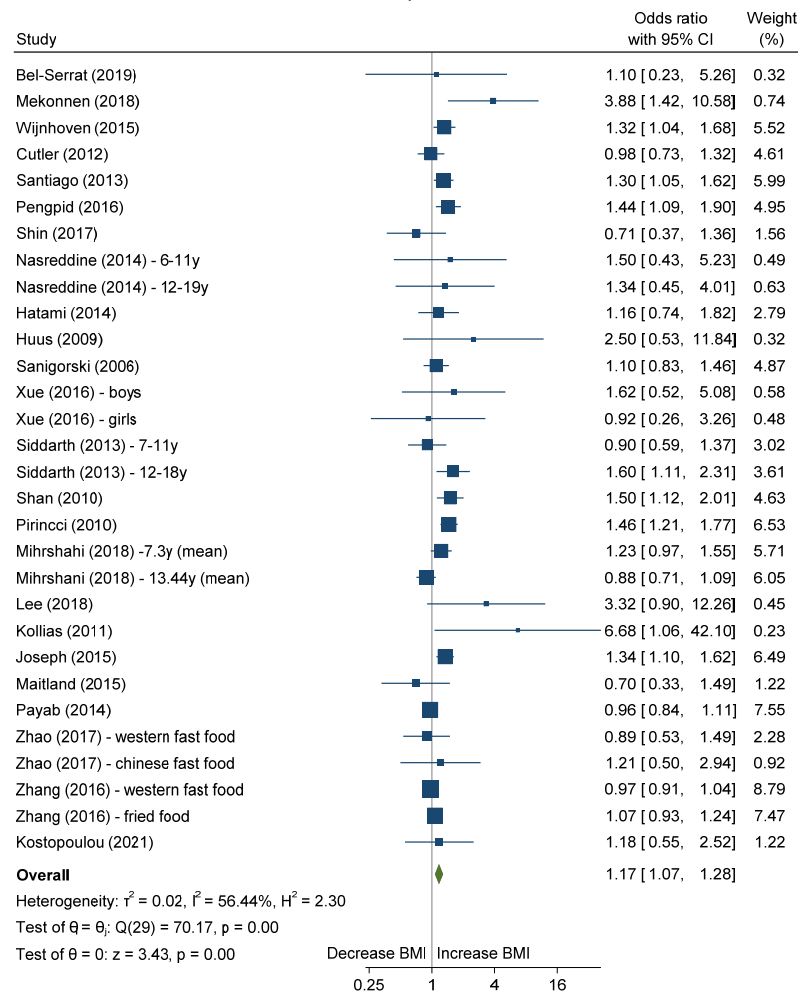

Random-effects REML model

**Figure S13.** Association between a high intake of fast food and risk of overweight/obesity in children and adolescents 5-18 years.

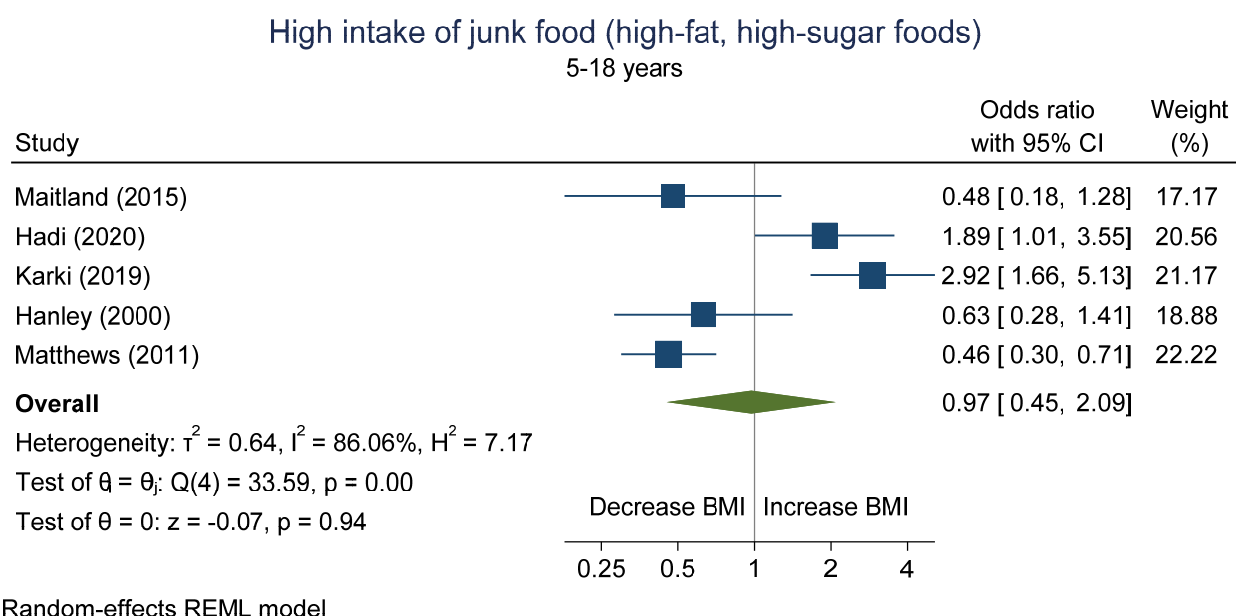

**Figure S14.** Association between a high intake of junk food and risk of overweight/obesity in children and adolescents 5-18 years.

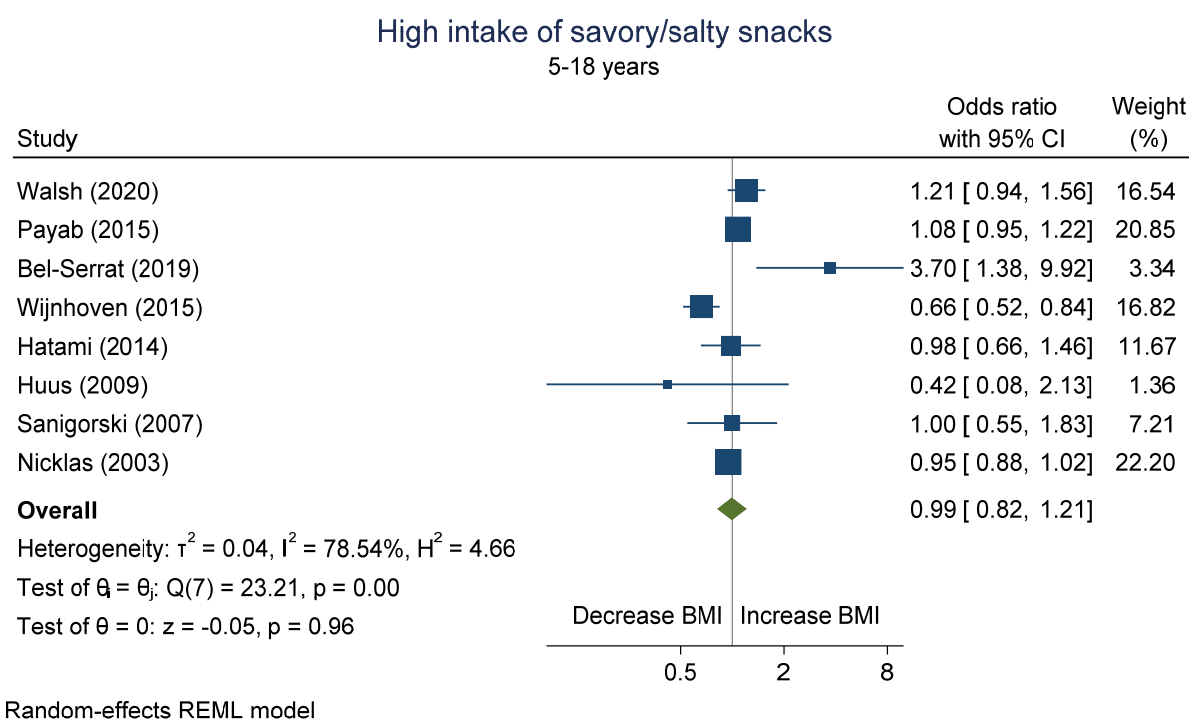

**Figure S15.** Association between a high intake of savory/salty snacks and risk of overweight/obesity in children and adolescents 5-18 years.

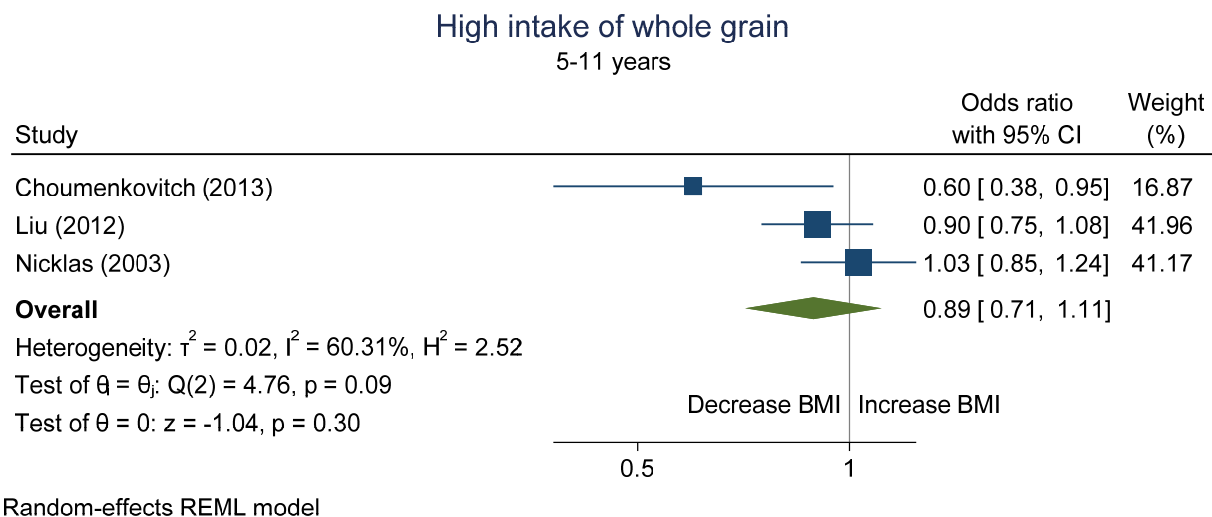

**Figure S16.** Association between a high intake of whole grain and risk of overweight/obesity in children and adolescents 5-11 years.

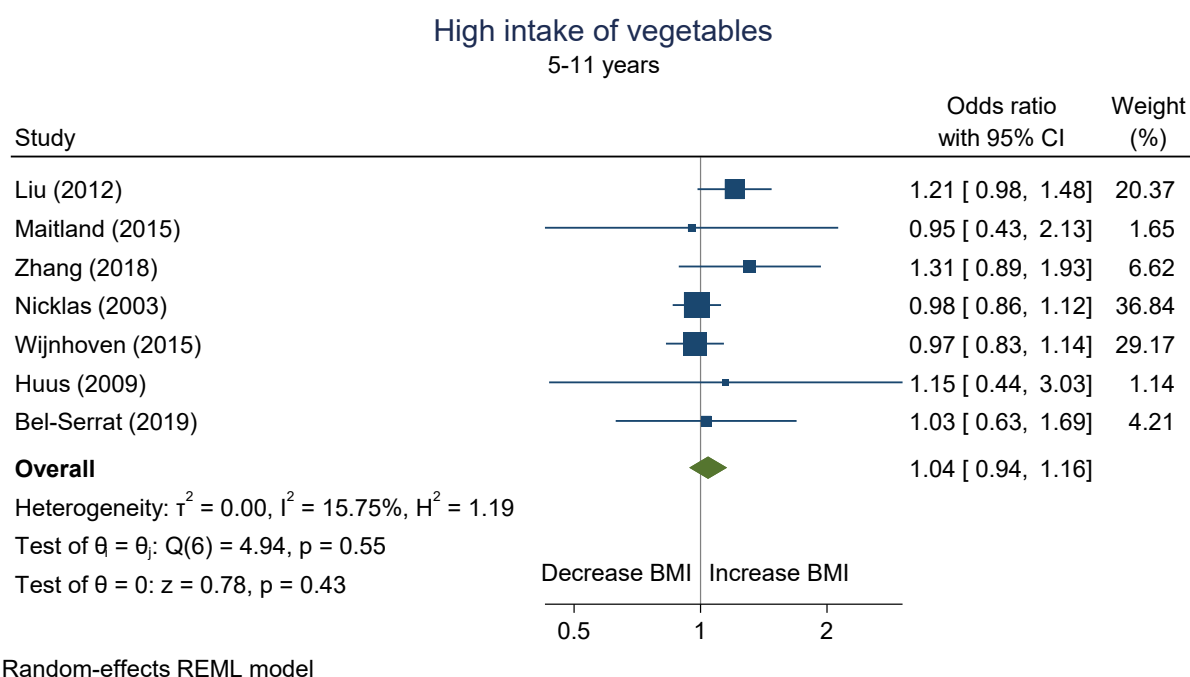

**Figure S17.** Association between a high intake of vegetables and risk of overweight/obesity in children and adolescents 5-11 years.



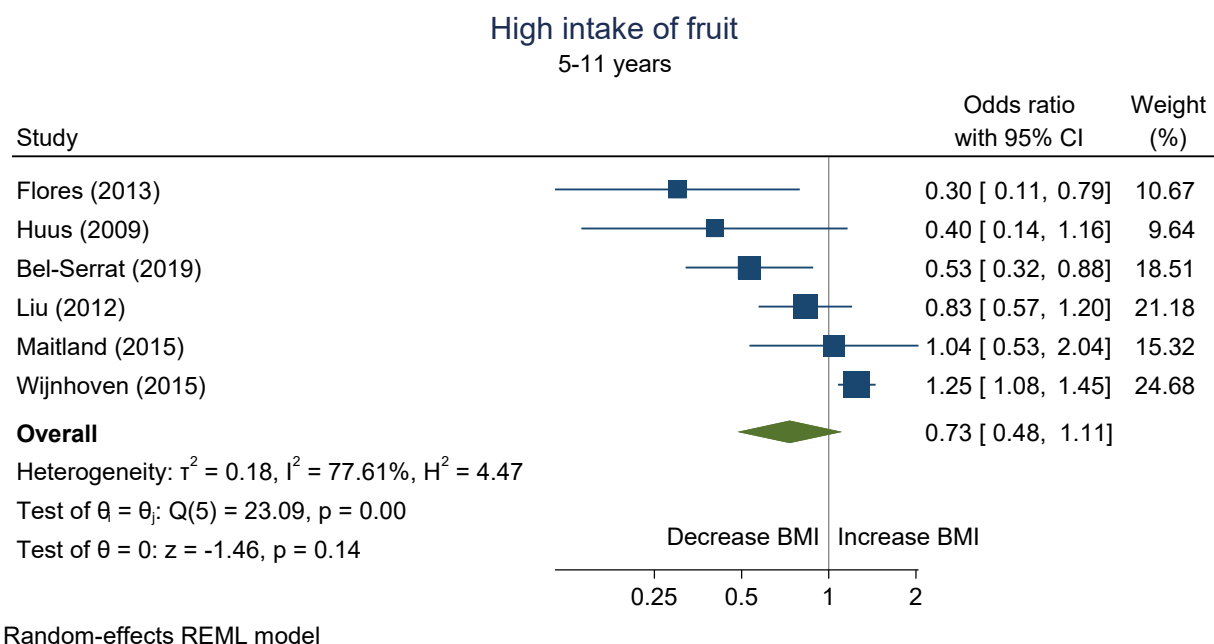

**Figure S18.** Association between a high intake of fruit and risk of overweight/obesity in children and adolescents 5-11 years.

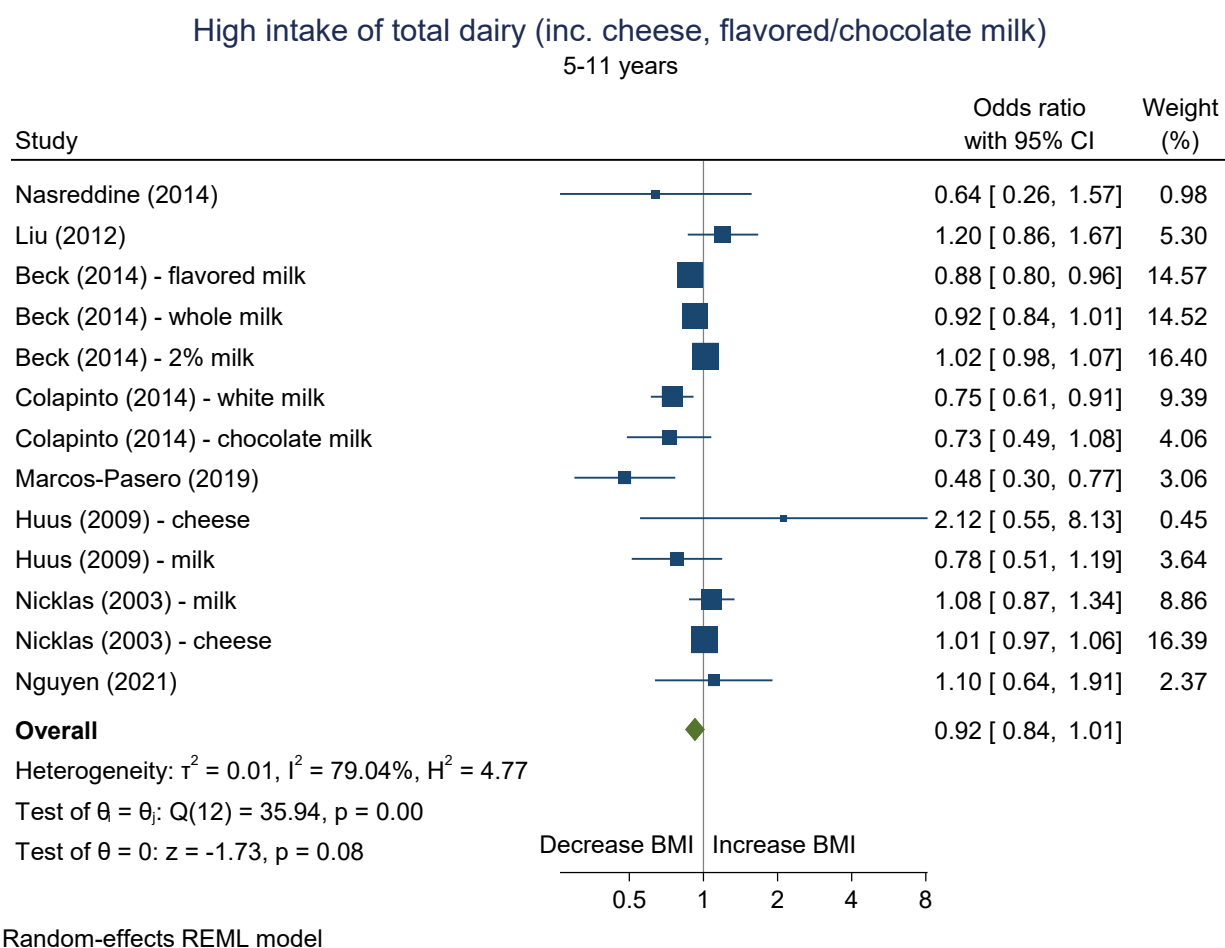

**Figure S19.** Association between a high intake of total dairy and risk of overweight/obesity in children and adolescents 5-11 years.

## High intake of milk and dairy (cheese excluded)

5-11 years

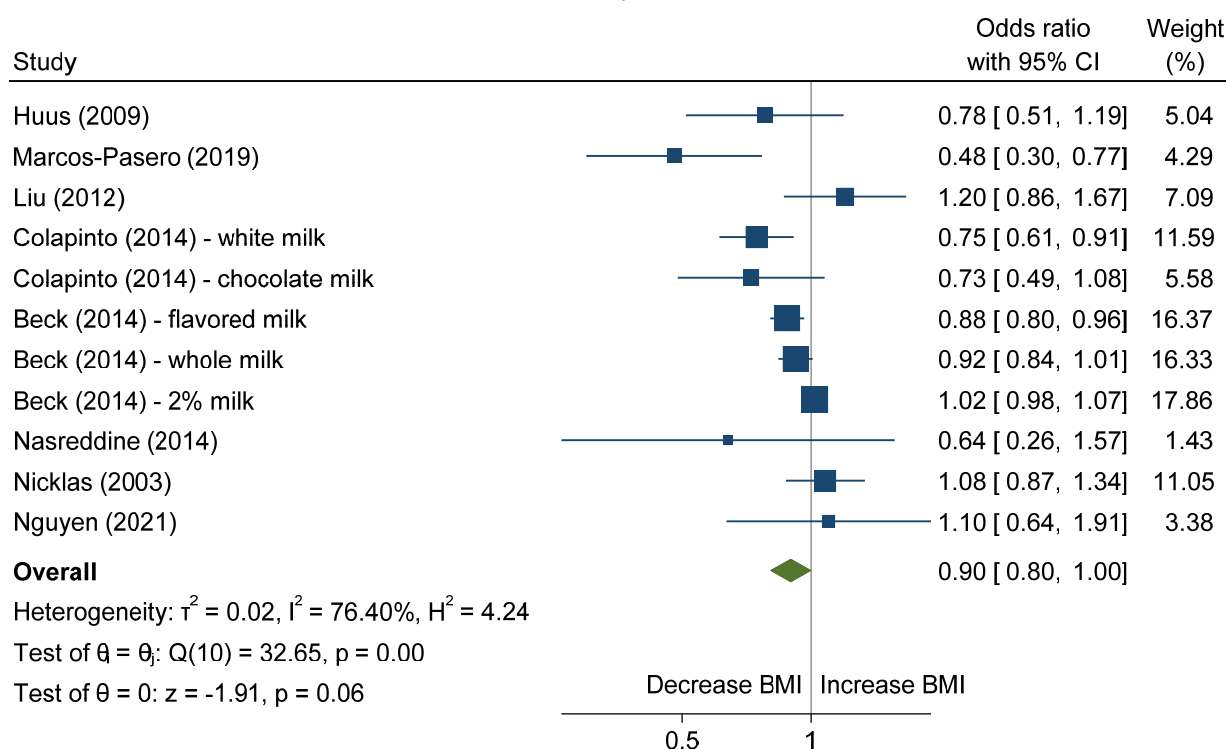

Random-effects REML model

**Figure S20.** Association between a high intake of milk and dairy and risk of overweight/obesity in children and adolescents 5-11 years.

## High intake of sweets and candy

5-11 years

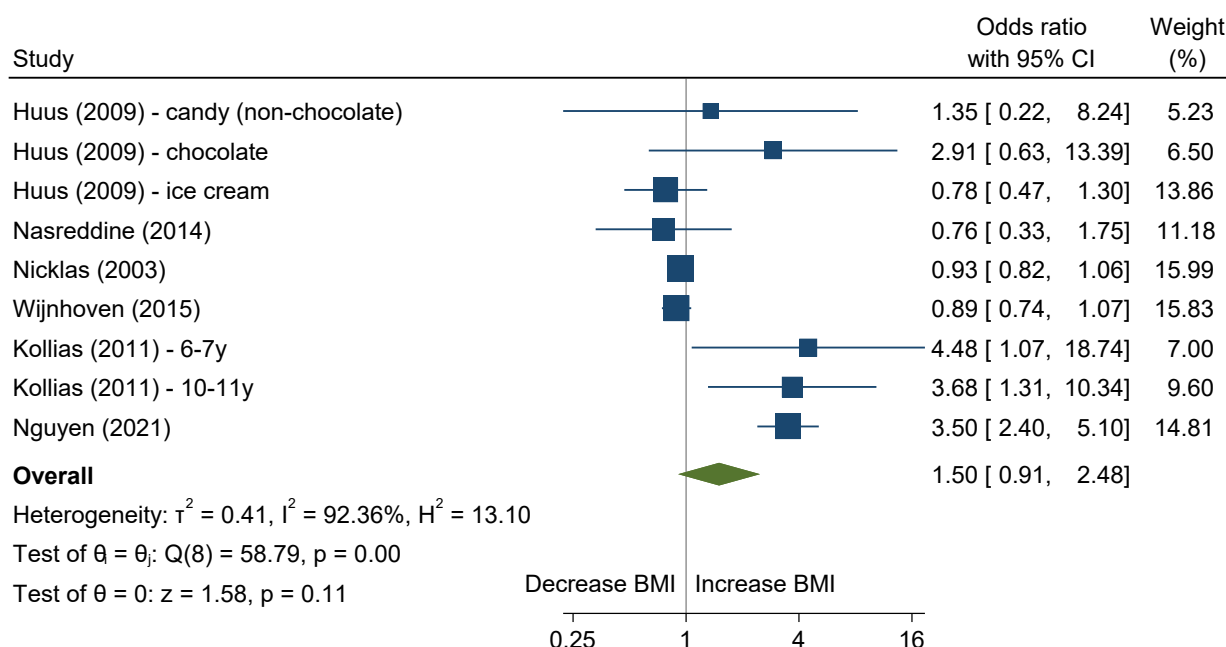

Random-effects REML model

**Figure S21.** Association between a high intake of sweets and candy and risk of overweight/obesity in children and adolescents 5-11 years.

## High intake of sugar-sweetened beverages

5-11 years

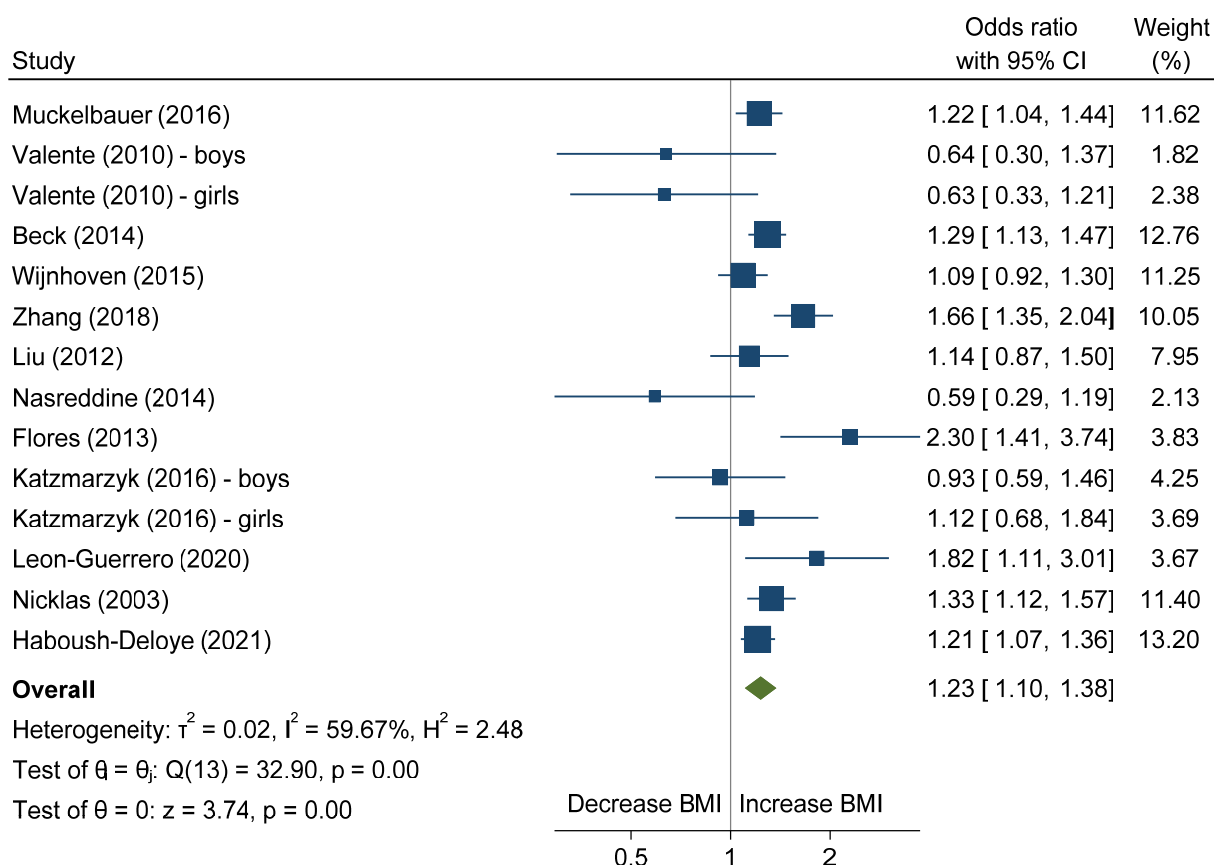

Random-effects REML model

**Figure S22.** Association between a high intake of sugar-sweetened beverages and risk of overweight/obesity in children and adolescents 5-11 years.

## High intake of fast food

5-11 years

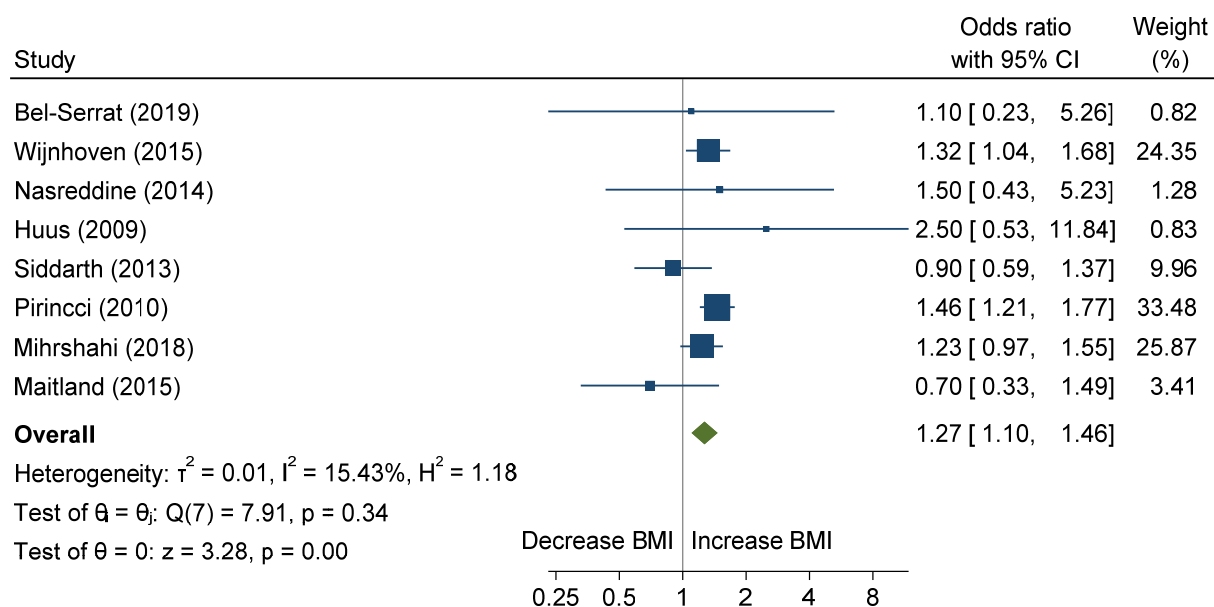

Random-effects REML model

**Figure S23.** Association between a high intake of fast food and risk of overweight/obesity in children and adolescents 5-11 years.

## High intake of savory-salty snacks

5-11 years

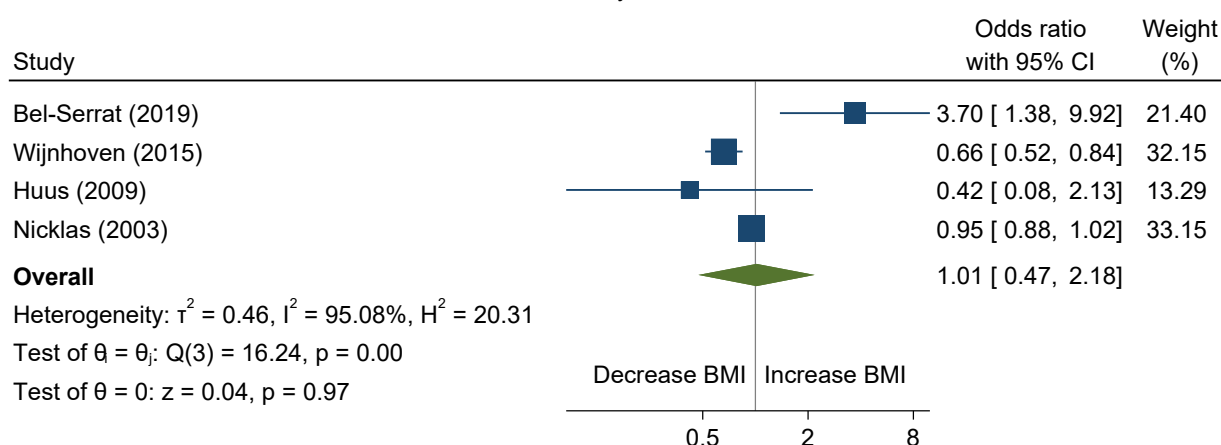

Random-effects REML model

**Figure S24.** Association between a high intake of savory-salty snacks and risk of overweight/obesity in children and adolescents 5-11 years.

## High intake of vegetables

12-18 years

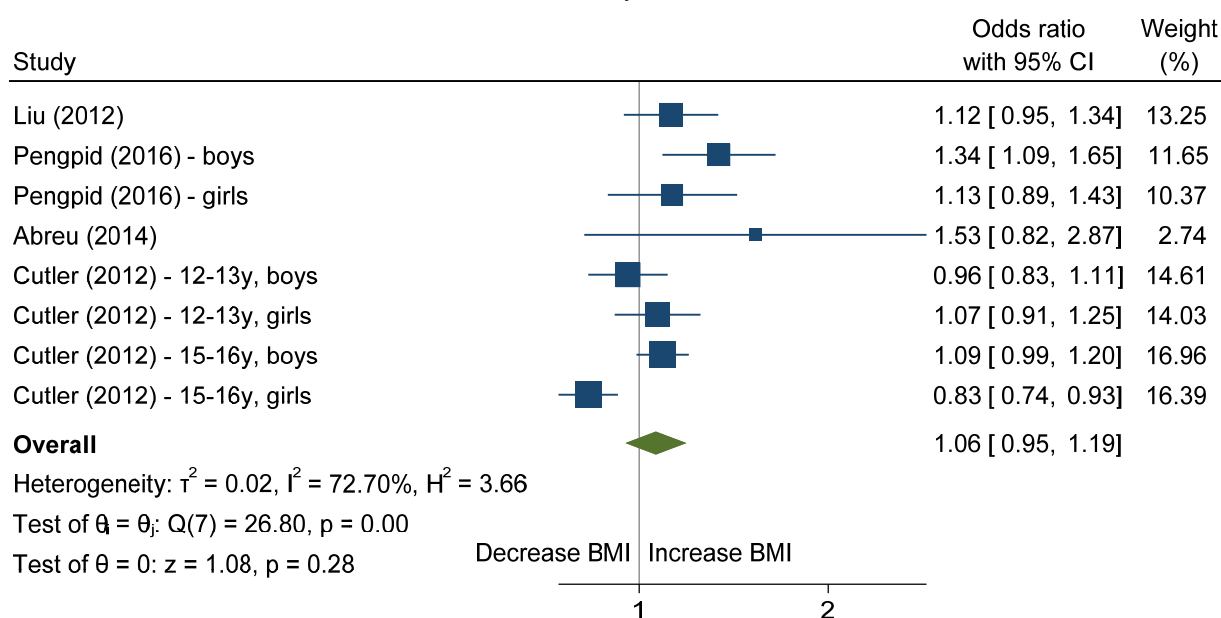

Random-effects REML model

**Figure S25.** Association between a high intake of vegetables and risk of overweight/obesity in children and adolescents 12-18 years.

## High intake of fruit

12-18 years

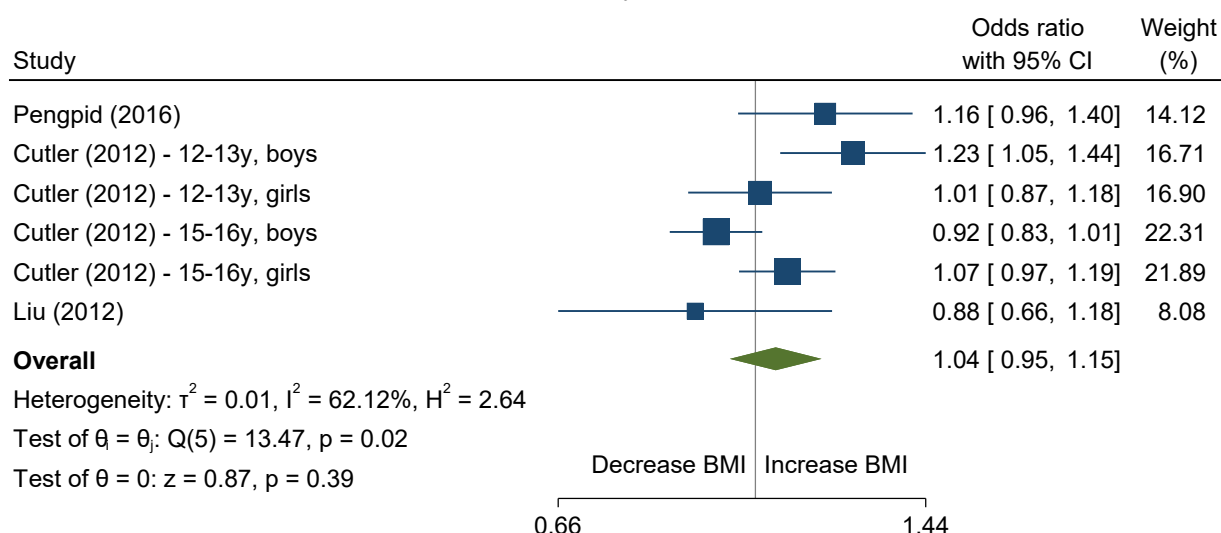

Random-effects REML model

**Figure S26.** Association between a high intake of fruit and risk of overweight/obesity in children and adolescents 12-18 years.

## High intake of sugar-sweetened beverages

12-18 years

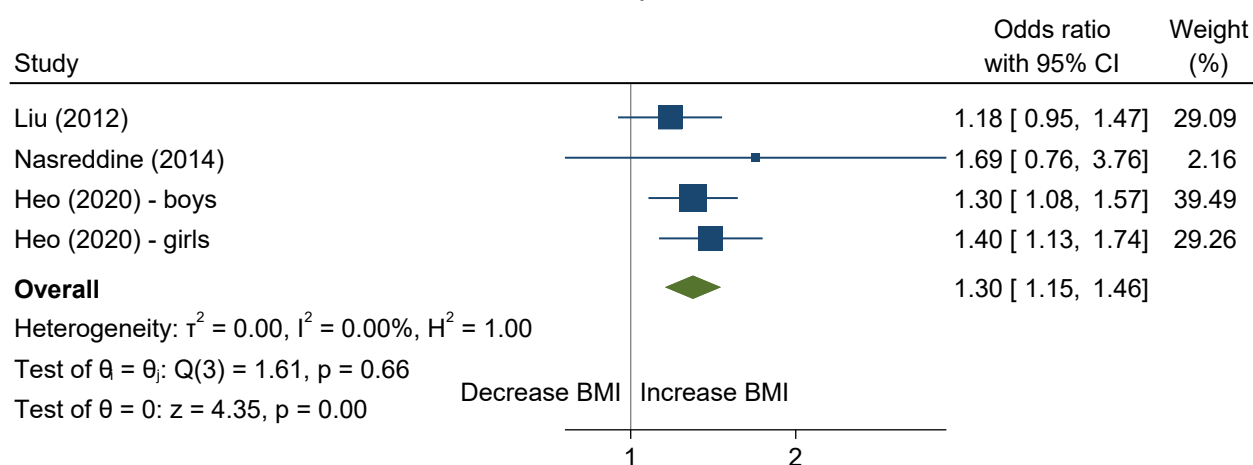

Random-effects REML model

**Figure S27.** Association between a high intake of sugar-sweetened beverages and risk of overweight/obesity in children and adolescents 12-18 years.

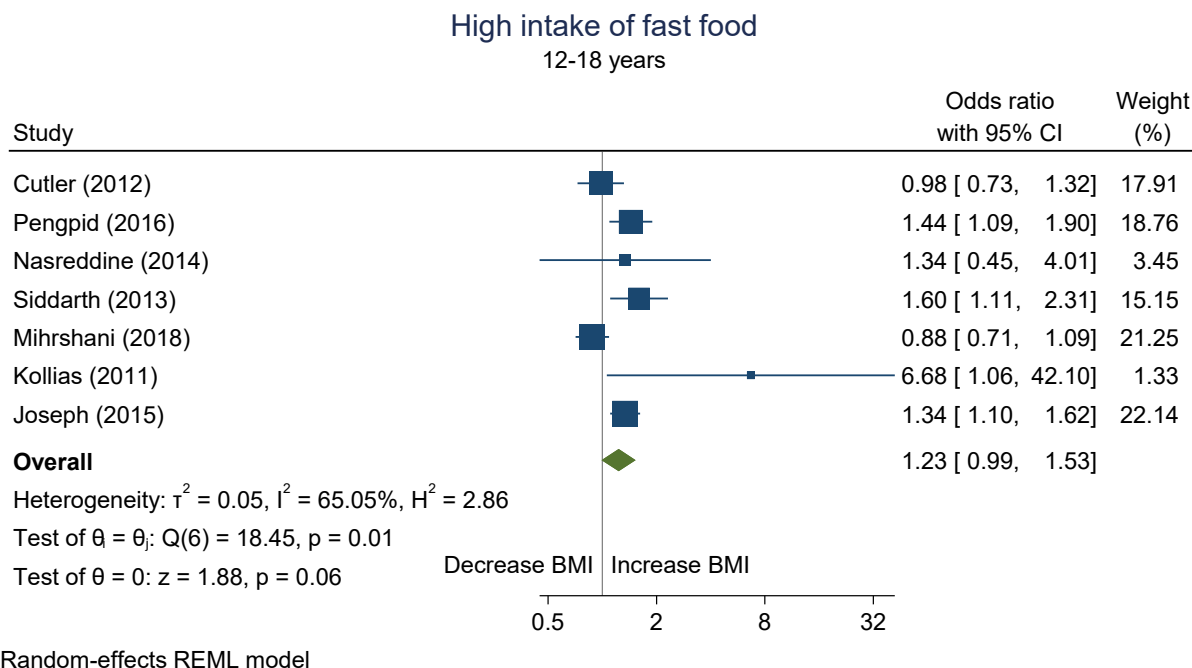

**Figure S28.** Association between a high intake of fast food and risk of overweight/obesity in children and adolescents 12-18 years.

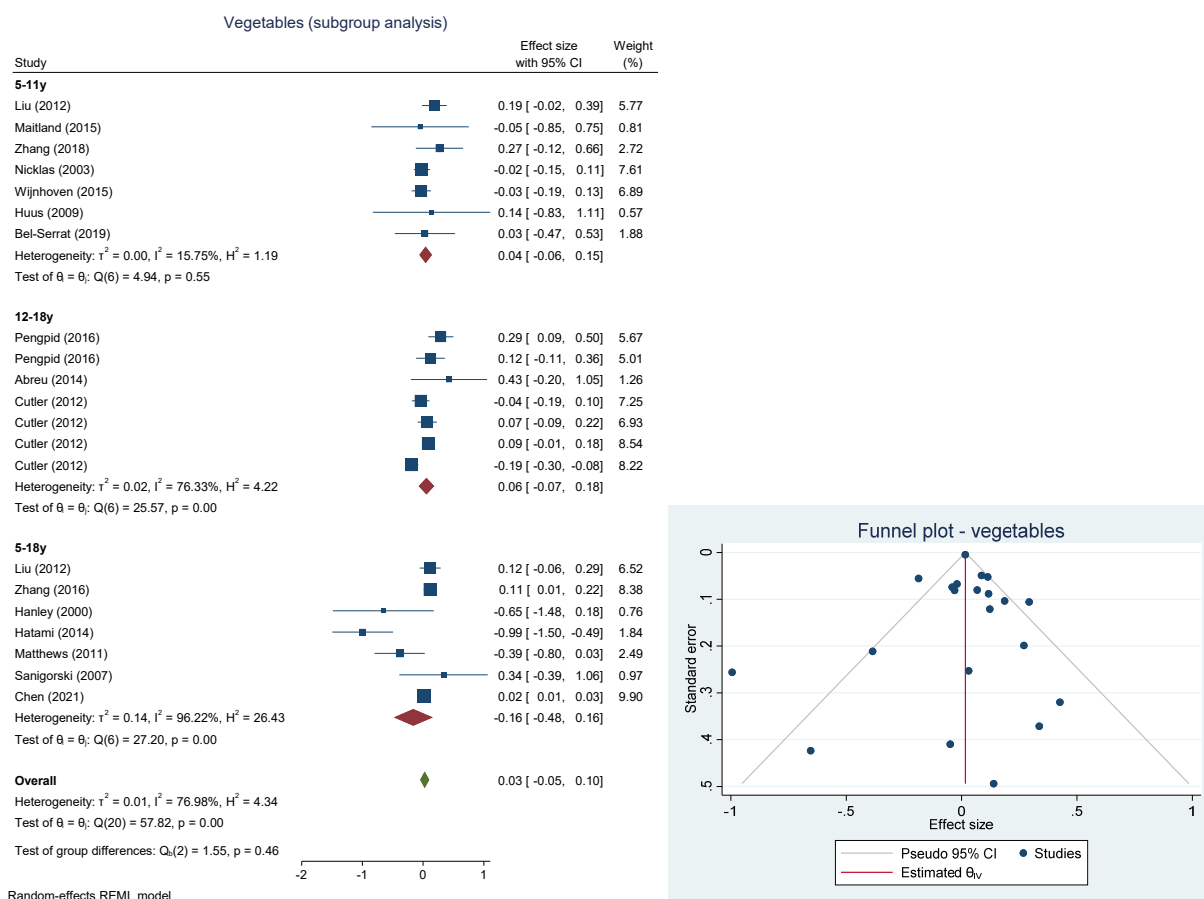

**Figure S29.** Subgroup analysis according to age and funnel plot investigating heterogeneity - vegetables.

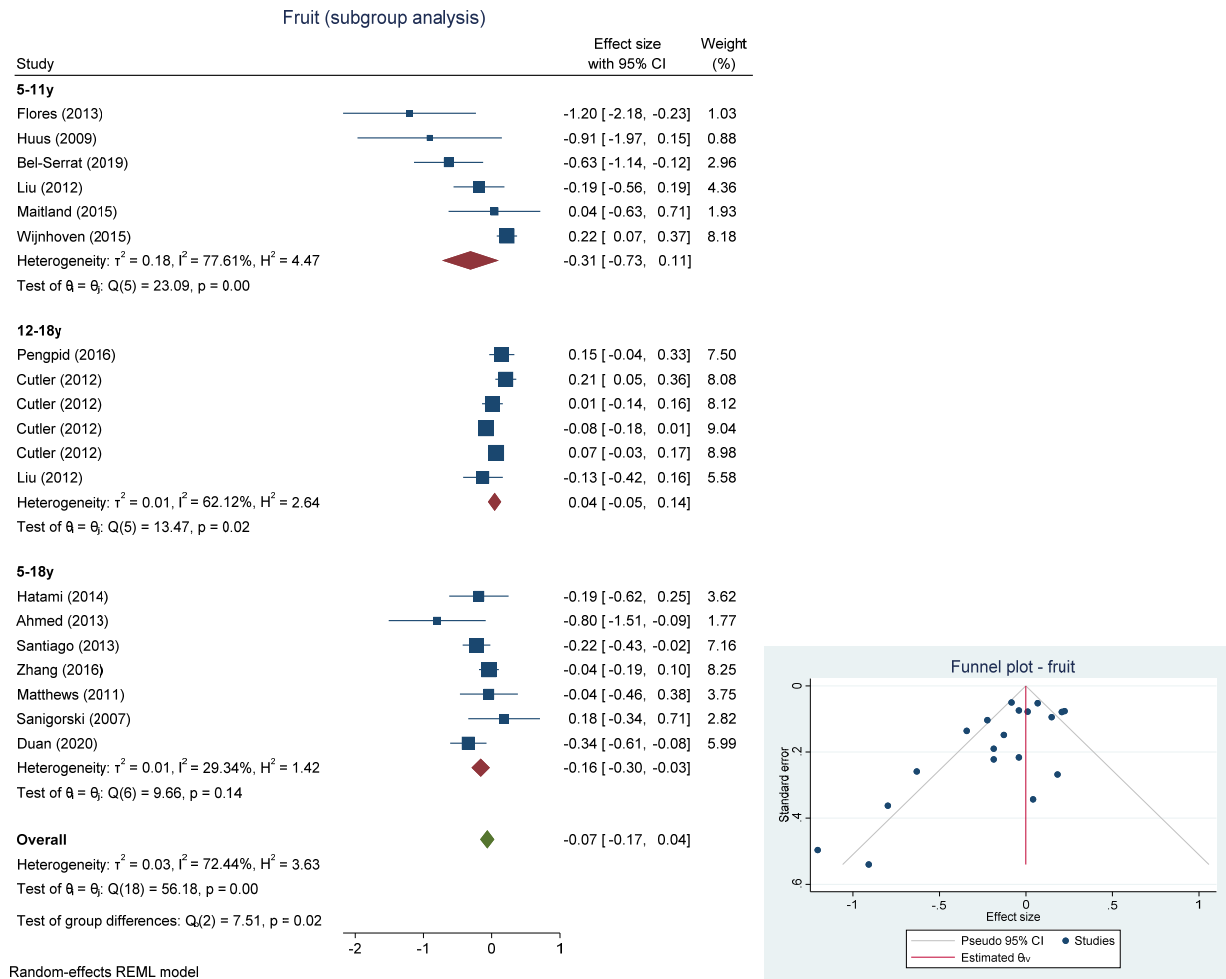

**Figure S30.** Subgroup analysis according to age and funnel plot investigating heterogeneity - fruit.

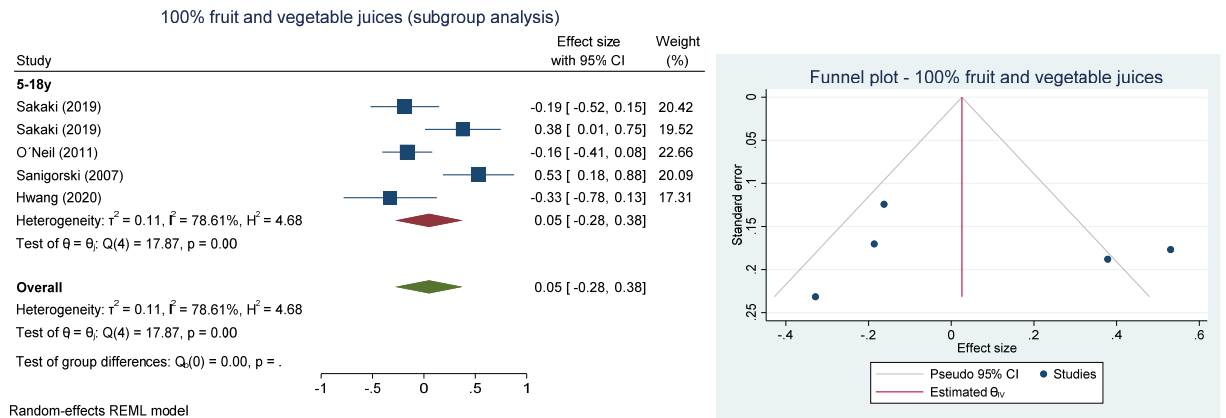

**Figure S31.** Subgroup analysis according to age and funnel plot investigating heterogeneity – 100% fruit and vegetables juices.

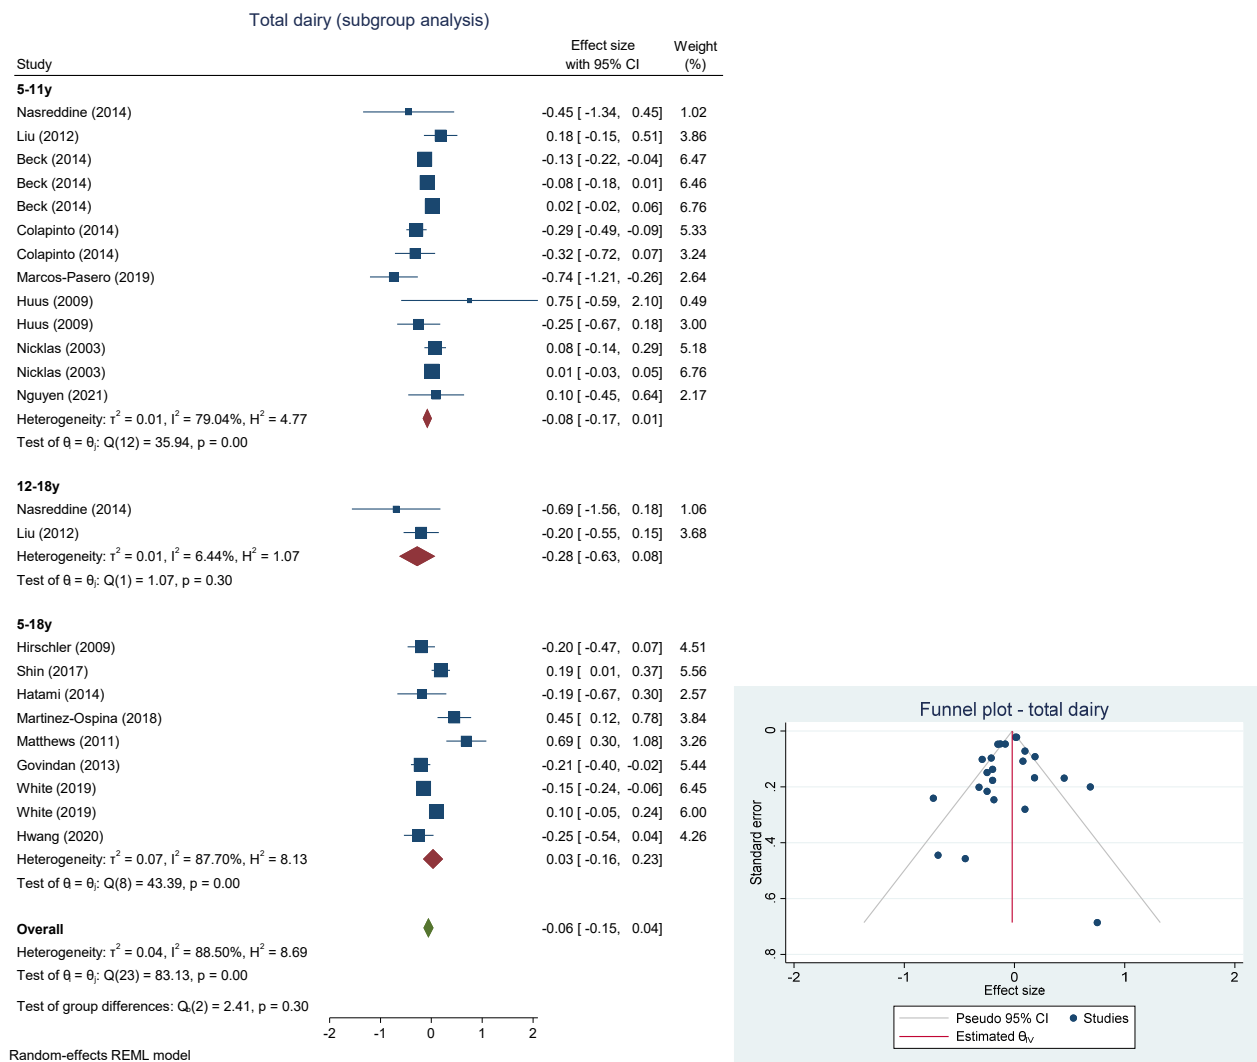

**Figure S32.** Subgroup analysis according to age and funnel plot investigating heterogeneity – total dairy.

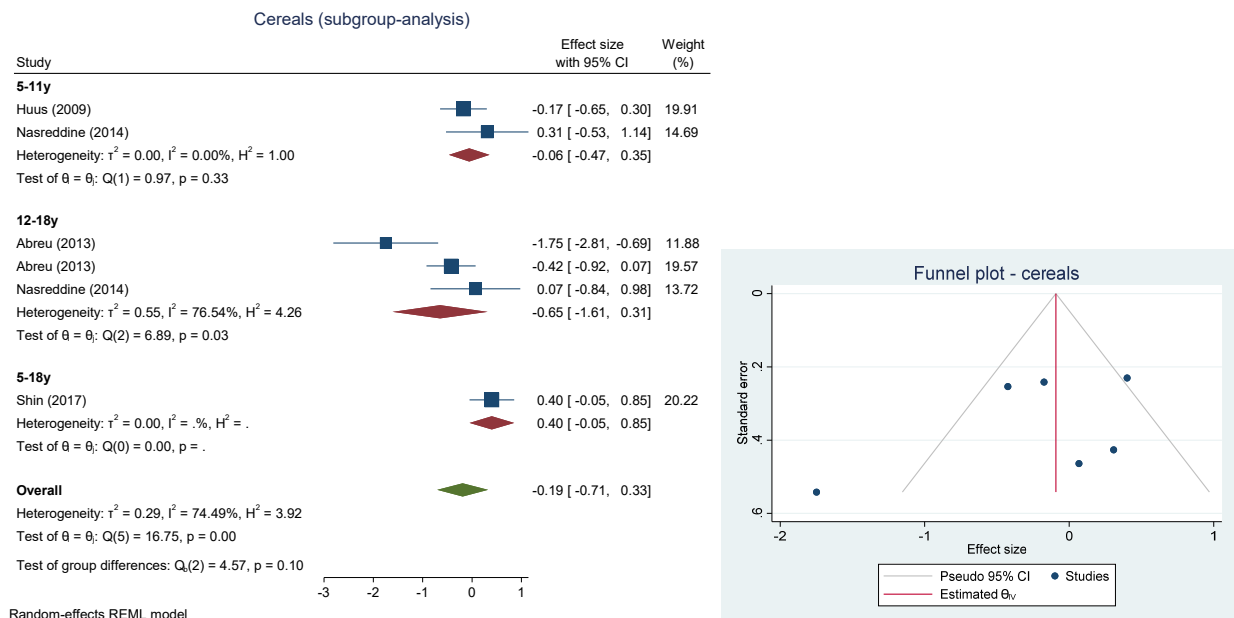

**Figure S33.** Subgroup analysis according to age and funnel plot investigating heterogeneity – cereals.



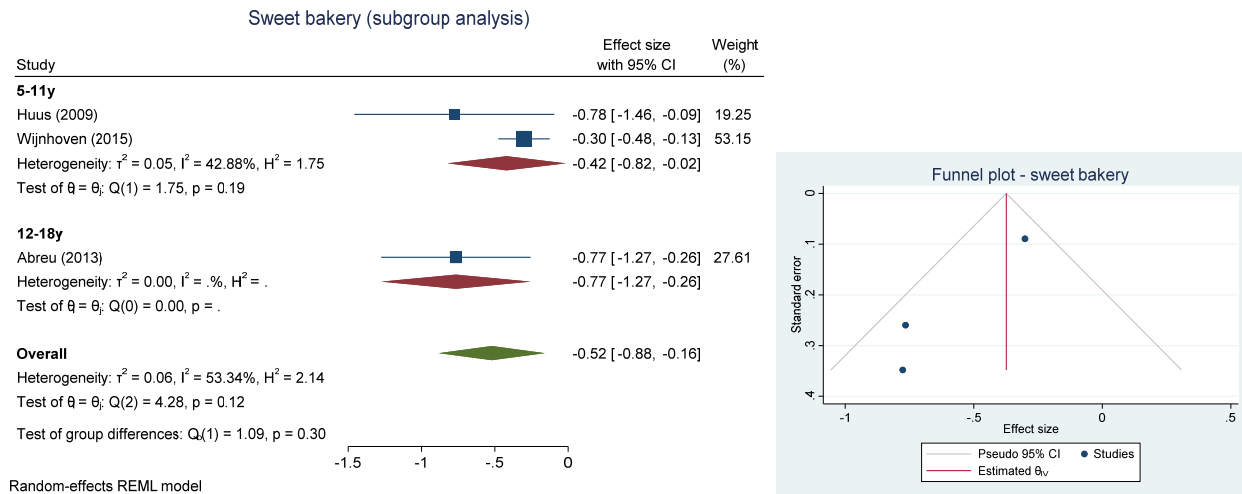

**Figure S34.** Subgroup analysis according to age and funnel plot investigating heterogeneity – sweet bakery.

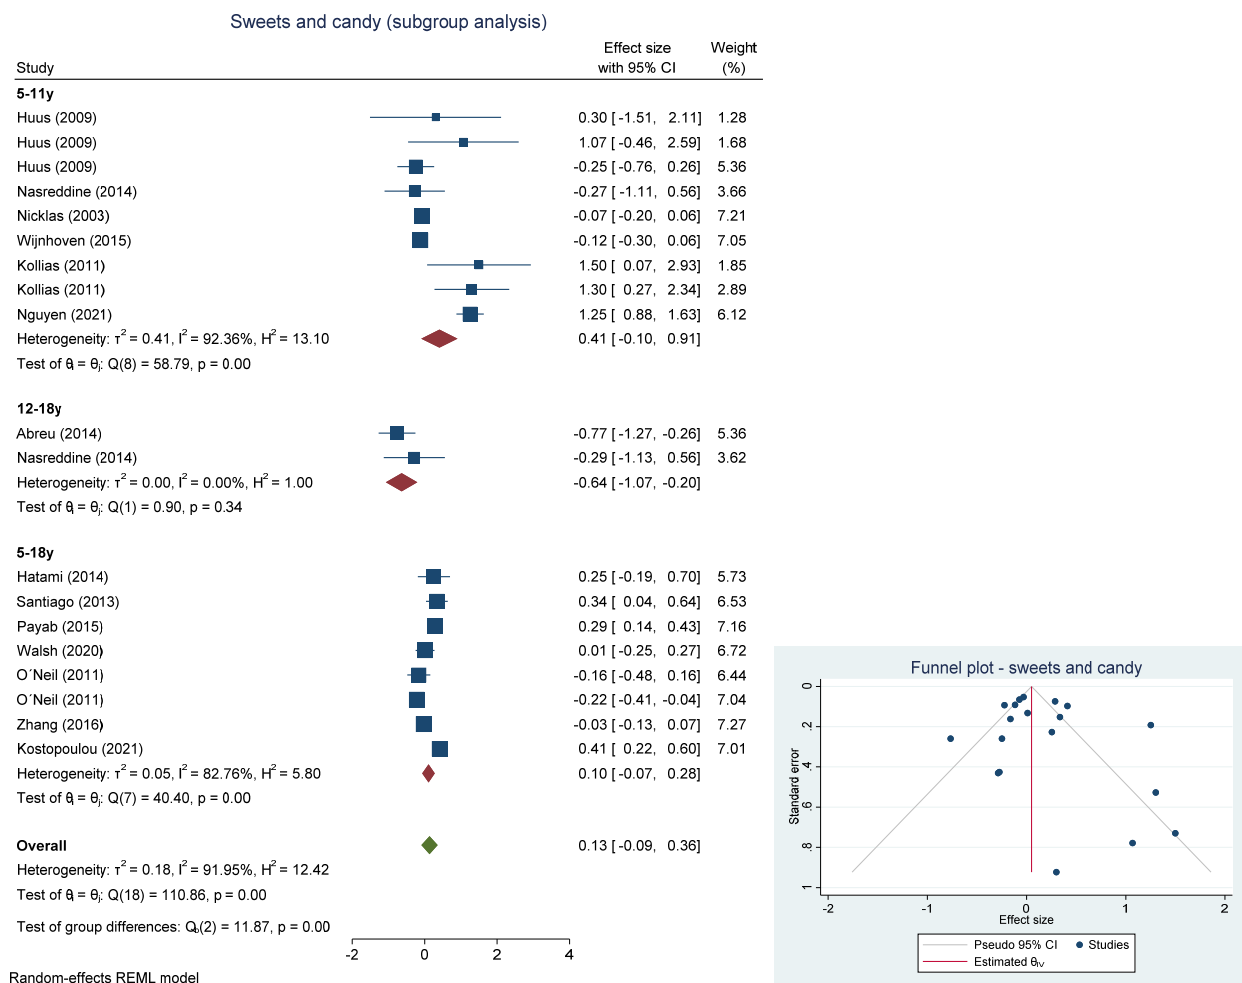

**Figure S35.** Subgroup analysis according to age and funnel plot investigating heterogeneity – sweets and candy.

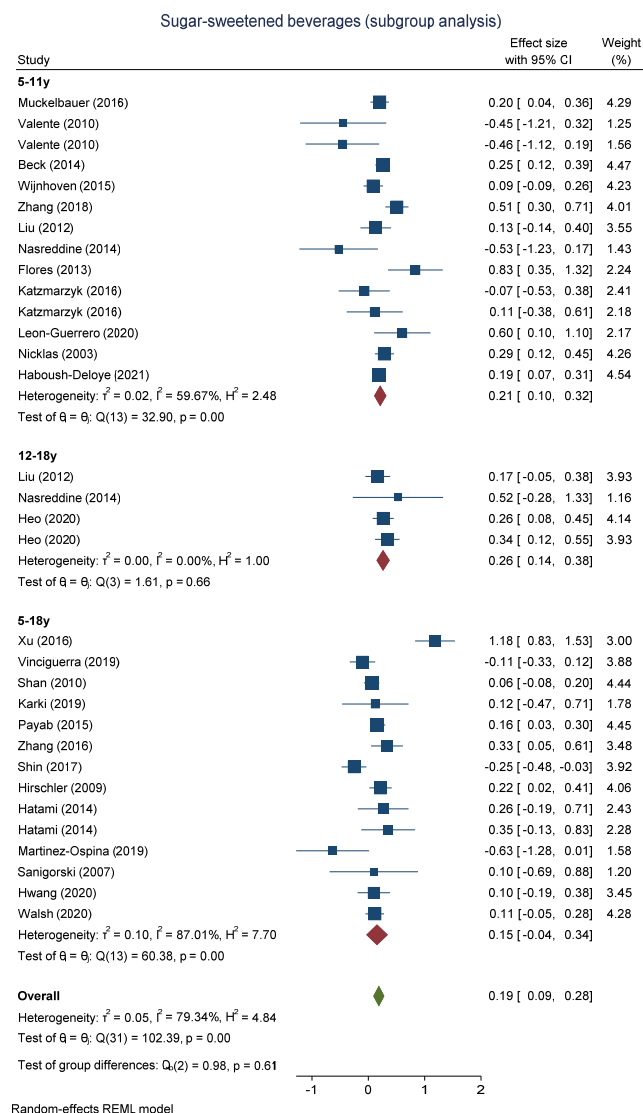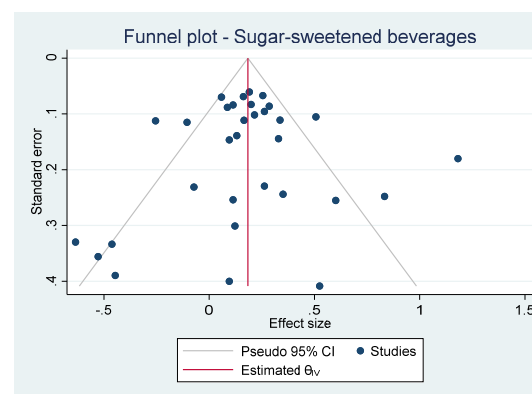

**Figure S36.** Subgroup analysis according to age and funnel plot investigating heterogeneity – sugar-sweetened beverages.

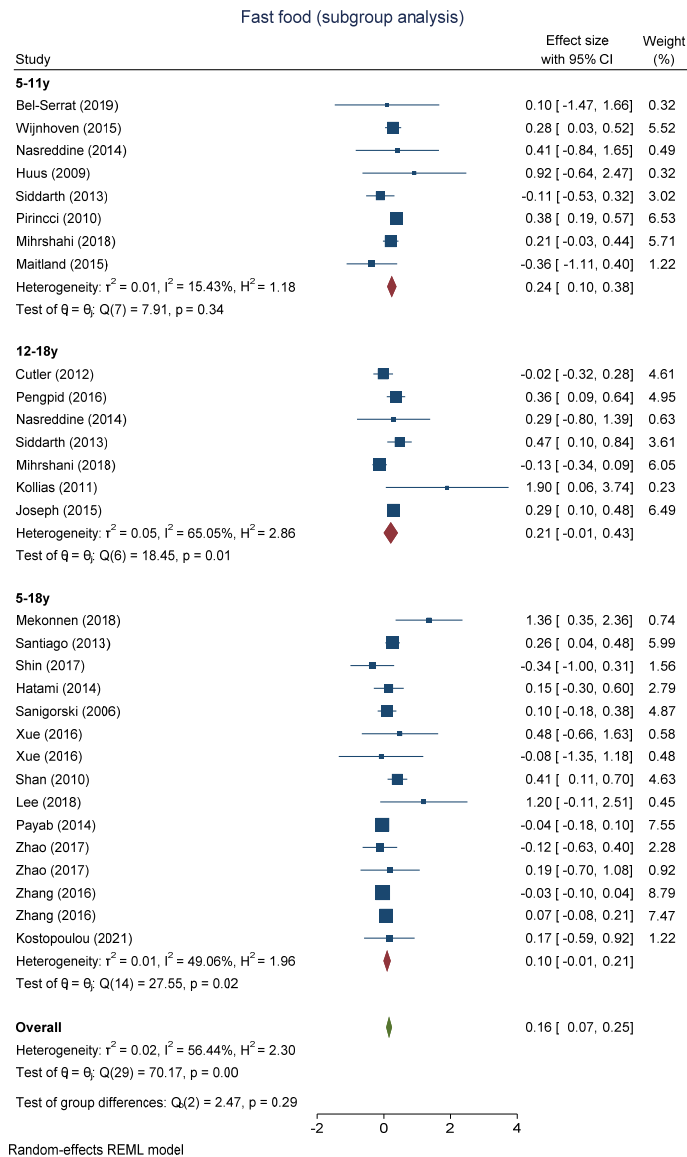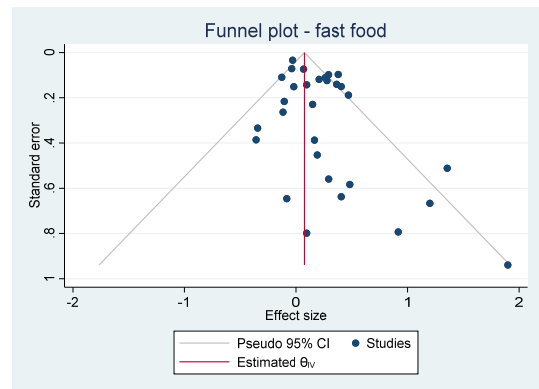

**Figure S37.** Subgroup analysis according to age and funnel plot investigating heterogeneity – fast food.

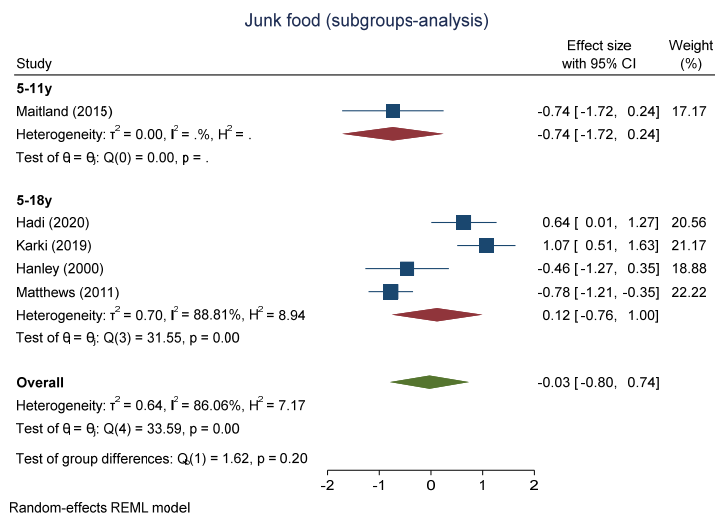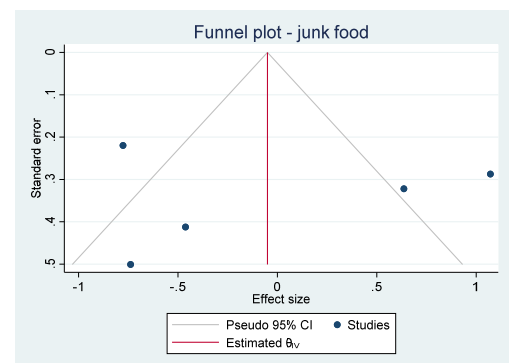

**Figure S38.** Subgroup analysis according to age and funnel plot investigating heterogeneity – junk food.

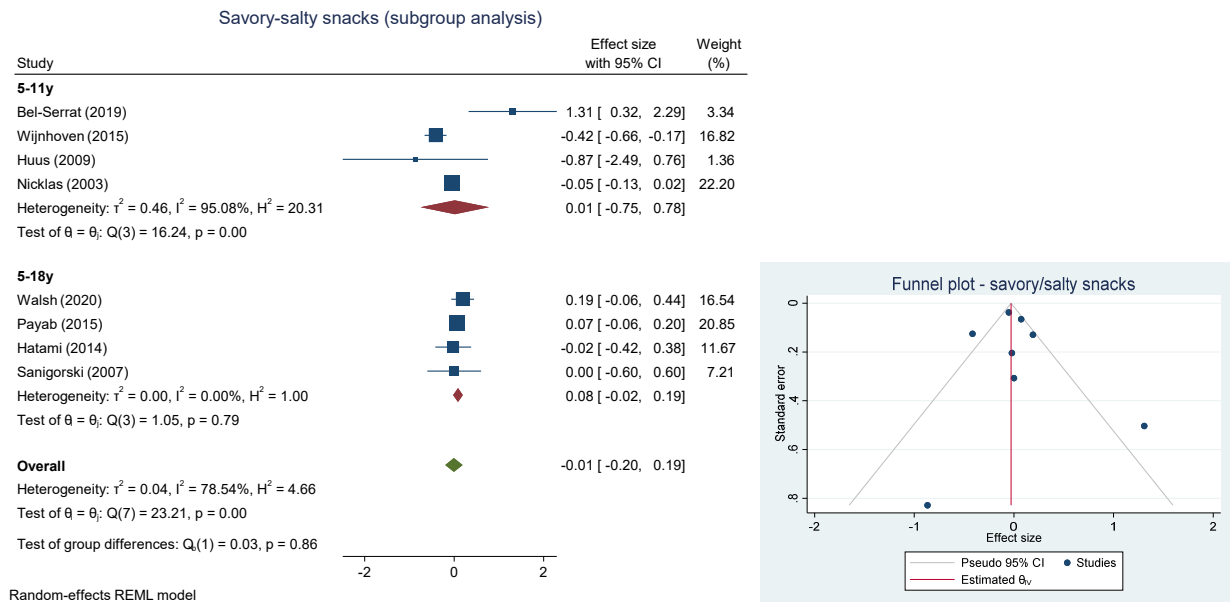

**Figure S39.** Subgroup analysis according to age and funnel plot investigating heterogeneity – savory-salty snacks.

## References

1. Abreu, S., et al., Food consumption, physical activity and socio-economic status related to BMI, waist circumference and waist-to-height ratio in adolescents. *Public Health Nutr*, 2014. **17**(8): p. 1834-49.
2. Ahmed, J., et al., Prevalence of and factors associated with obesity among Pakistani schoolchildren: a school-based, cross-sectional study. *East Mediterr Health J*, 2013. **19**(3): p. 242-7.
3. Beck, A.L., et al., Association of beverage consumption with obesity in Mexican American children. *Public Health Nutr*, 2014. **17**(2): p. 338-44.
4. Bel-Serrat, S., et al., Predictors of weight status in school-aged children: a prospective cohort study. *Eur J Clin Nutr*, 2019. **73**(9): p. 1299-1306.
5. Chen, J., et al., The relationship between socioeconomic status and childhood overweight/obesity is linked through paternal obesity and dietary intake: a cross-sectional study in Chongqing, China. *Environ Health Prev Med*, 2021. **26**(1): p. 56.
6. Choumenkovitch, S.F., et al., Whole grain consumption is inversely associated with BMI Z-score in rural school-aged children. *Public Health Nutr*, 2013. **16**(2): p. 212-8.
7. Colapinto, C.K., et al., Obesity, lifestyle and socio-economic determinants of vitamin D intake: a population-based study of Canadian children. *Can J Public Health*, 2014. **105**(6): p. e418-24.
8. Cutler, G.J., et al., Association between major patterns of dietary intake and weight status in adolescents. *Br J Nutr*, 2012. **108**(2): p. 349-56.
9. Denova-Gutiérrez, E., et al., Association between sweetened beverage consumption and body mass index, proportion of body fat and body fat distribution in Mexican adolescents. *Ann Nutr Metab*, 2008. **53**(3-4): p. 245-51.
10. Duan, R., et al., Prevalence and correlates of overweight and obesity among adolescents in northeastern China: a cross-sectional study. *BMJ Open*, 2020. **10**(7): p. e036820.
11. Flores, G. and H. Lin, *Factors predicting severe childhood obesity in kindergarteners*. *Int J Obes (Lond)*, 2013. **37**(1): p. 31-9.
12. Gibson, S. and D. Neate, Sugar intake, soft drink consumption and body weight among British children: further analysis of National Diet and Nutrition Survey data with adjustment for under-reporting and physical activity. *Int J Food Sci Nutr*, 2007. **58**(6): p. 445-60.
13. Govindan, M., et al., Gender differences in physiologic markers and health behaviors associated with childhood obesity. *Pediatrics*, 2013. **132**(3): p. 468-74.
14. Haboush-Deloye, A., et al., Obesity in Early Childhood: Examining the Relationship among Demographic, Behavioral, Nutritional, and Socioeconomic Factors. *Child Obes*, 2021. **17**(5): p. 349-356.
15. Hadi, H., et al., Improved Understanding of Interactions between Risk Factors for Child Obesity May Lead to Better Designed Prevention Policies and Programs in Indonesia. *Nutrients*, 2020. **12**(1).
16. Hanley, A.J., et al., Overweight among children and adolescents in a Native Canadian community: prevalence and associated factors. *Am J Clin Nutr*, 2000. **71**(3): p. 693-700.
17. Hatami, M., et al., Dietary factors as the major determinants of overweight and obesity among Iranian adolescents. A cross-sectional study. *Appetite*, 2014. **82**: p. 194-201.
18. Heo, M. and J. Wylie-Rosett, Being obese versus trying to lose weight: Relationship with physical inactivity and soda drinking among high school students. *J Sch Health*, 2020. **90**(4): p. 301-305.
19. Hirschler, V., et al., Overweight and lifestyle behaviors of low socioeconomic elementary school children in Buenos Aires. *BMC Pediatr*, 2009. **9**: p. 17.

20. Huus, K., et al., Relationship of food frequencies as reported by parents to overweight and obesity at 5 years. *Acta Paediatr*, 2009. **98**(1): p. 139-43.
21. Hwang, S.B., et al., Trends in Beverage Consumption and Related Demographic Factors and Obesity among Korean Children and Adolescents. *Nutrients*, 2020. **12**(9).
22. Joseph, N., et al., Fast Food Consumption Pattern and Its Association with Overweight Among High School Boys in Mangalore City of Southern India. *J Clin Diagn Res*, 2015. **9**(5): p. Lc13-7.
23. Karki, A., A. Shrestha, and N. Subedi, Prevalence and associated factors of childhood overweight/obesity among primary school children in urban Nepal. *BMC Public Health*, 2019. **19**(1): p. 1055.
24. Katzmarzyk, P.T., et al., Relationship between Soft Drink Consumption and Obesity in 9-11 Years Old Children in a Multi-National Study. *Nutrients*, 2016. **8**(12).
25. Kollias, A., et al., Obesity and associated cardiovascular risk factors among schoolchildren in Greece: a cross-sectional study and review of the literature. *J Pediatr Endocrinol Metab*, 2011. **24**(11-12): p. 929-38.
26. Kostopoulou, E., et al., Association of lifestyle factors with a high prevalence of overweight and obesity in Greek children aged 10-16 years. *Acta Paediatr*, 2021. **110**(12): p. 3356-3364.
27. Lee, E.Y., et al., Study Time after School and Habitual Eating Are Associated with Risk for Obesity among Overweight Korean Children: A Prospective Study. *Obes Facts*, 2018. **11**(1): p. 46-55.
28. Leon Guerrero, R.T., et al., Prevalence and Predictors of Overweight and Obesity among Young Children in the Children's Healthy Living Study on Guam. *Nutrients*, 2020. **12**(9).
29. Liu, J.H., et al., Diet, physical activity, and sedentary behaviors as risk factors for childhood obesity: an urban and rural comparison. *Child Obes*, 2012. **8**(5): p. 440-8.
30. Maitland, T.E., S. Malcolm, and S. Handfield, Nutritional Knowledge and Practices, Lifestyle Characteristics and Anthropometric Status of Turks and Caicos Islands Elementary School Children. *West Indian Med J*, 2015. **64**(1): p. 29-36.
31. Marcos-Pasero, H., et al., Association of calcium and dairy product consumption with childhood obesity and the presence of a Brain Derived Neurotrophic Factor-Antisense (BDNF-AS) polymorphism. *Clin Nutr*, 2019. **38**(6): p. 2616-2622.
32. Martinez-Ospina, A., et al., School Food Environment, Food Consumption, and Indicators of Adiposity Among Students 7-14 Years in Bogotá, Colombia. *J Sch Health*, 2019. **89**(3): p. 200-209.
33. Matthews, V.L., M. Wien, and J. Sabaté, The risk of child and adolescent overweight is related to types of food consumed. *Nutr J*, 2011. **10**: p. 71.
34. Mekonnen, T., A. Tariku, and S.M. Abebe, Overweight/obesity among school aged children in Bahir Dar City: cross sectional study. *Ital J Pediatr*, 2018. **44**(1): p. 17.
35. Mihrshahi, S., et al., Associations between childhood overweight, obesity, abdominal obesity and obesogenic behaviors and practices in Australian homes. *BMC Public Health*, 2017. **18**(1): p. 44.
36. Muckelbauer, R., et al., Changes in water and sugar-containing beverage consumption and body weight outcomes in children. *Br J Nutr*, 2016. **115**(11): p. 2057-66.
37. Nasreddine, L., et al., Dietary, lifestyle and socio-economic correlates of overweight, obesity and central adiposity in Lebanese children and adolescents. *Nutrients*, 2014. **6**(3): p. 1038-62.
38. Nguyen, T., et al., Early childhood factors associated with obesity at age 8 in Vietnamese children: The Young Lives Cohort Study. *BMC Public Health*, 2021. **21**(1): p. 301.
39. Nicklas, T.A., et al., Eating patterns and obesity in children. The Bogalusa Heart Study. *Am J Prev Med*, 2003. **25**(1): p. 9-16.
40. Notara, V., et al., Lack of association between dietary fibres intake and childhood obesity: an epidemiological study among preadolescents in Greece. *Int J Food Sci Nutr*, 2020. **71**(5): p. 635-643.
41. O'Neil, C.E., V.L. Fulgoni, 3rd, and T.A. Nicklas, Association of candy consumption with body weight measures, other health risk factors for cardiovascular disease, and diet quality in US children and adolescents: NHANES 1999-2004. *Food Nutr Res*, 2011. **55**.
42. Payab, M., et al., Association of junk food consumption with high blood pressure and obesity in Iranian children and adolescents: the CASPIAN-IV Study. *J Pediatr (Rio J)*, 2015. **91**(2): p. 196-205.
43. Pengpid, S. and K. Peltzer, OVERWEIGHT, OBESITY AND ASSOCIATED FACTORS AMONG 13-15 YEARS OLD STUDENTS IN THE ASSOCIATION OF SOUTHEAST ASIAN NATIONS MEMBER COUNTRIES, 2007-2014. *Southeast Asian J Trop Med Public Health*, 2016. **47**(2): p. 250-62.
44. Pirinçci, E., et al., Prevalence and risk factors of overweight and obesity among urban school children in Elazig city, Eastern Turkey, 2007. *Ann Hum Biol*, 2010. **37**(1): p. 44-56.
45. Sakaki, J.R., et al., Associations between 100% Orange Juice Consumption and Dietary, Lifestyle and Anthropometric Characteristics in a Cross-Sectional Study of U.S. Children and Adolescents. *Nutrients*, 2019. **11**(11).
46. Sanigorski, A.M., A.C. Bell, and B.A. Swinburn, *Association of key foods and beverages with obesity in Australian school-children*. *Public Health Nutr*, 2007. **10**(2): p. 152-7.
47. Santiago, S., et al., Gender differences in lifestyle determinants of overweight prevalence in a sample of Southern European children. *Obes Res Clin Pract*, 2013. **7**(5): p. e391-400.
48. Shan, X.Y., et al., Prevalence and behavioral risk factors of overweight and obesity among children aged 2-18 in Beijing, China. *Int J Pediatr Obes*, 2010. **5**(5): p. 383-9.
49. Shin, S.M., Association of Meat Intake with Overweight and Obesity among School-aged Children and Adolescents. *J Obes Metab Syndr*, 2017. **26**(3): p. 217-226.

50. Siddarth, D., *Risk factors for obesity in children and adults*. J Investig Med, 2013. **61**(6): p. 1039-42.
51. Valente, H., et al., Sugar-sweetened beverage intake and overweight in children from a Mediterranean country. Public Health Nutr, 2011. **14**(1): p. 127-32.
52. Vinciguerra, F., et al., Impact of unhealthy childhood and unfavorable parents' characteristics on adiposity in schoolchildren. Diabetes Metab Res Rev, 2019. **35**(8): p. e3199.
53. Walsh, C., et al., Snacking, sugar-sweetened beverage consumption and child obesity in low-income households. Nutrition & Food Science, 2020. **51**(1): p. 151-163.
54. White, M.J., et al., Associations between milk fat content and obesity, 1999 to 2016. Pediatr Obes, 2020. **15**(5): p. e12612.
55. Wijnhoven, T.M., et al., WHO European Childhood Obesity Surveillance Initiative: health-risk behaviours on nutrition and physical activity in 6-9-year-old schoolchildren. Public Health Nutr, 2015. **18**(17): p. 3108-24.
56. Xu, X., et al., Socioeconomic and lifestyle behavioral factors associated with overweight and obesity among rural to urban migrant children in central China. International Journal of Clinical and Experimental Medicine, 2016. **9**(11): p. 21635-21644.
57. Xue, H., et al., Time Trends in Fast Food Consumption and Its Association with Obesity among Children in China. PLoS One, 2016. **11**(3): p. e0151141.
58. Zhang, T., et al., The prevalence of obesity and influence of early life and behavioral factors on obesity in Chinese children in Guangzhou. BMC Public Health, 2016. **16**(1): p. 954.
59. Zhang, J., et al., Effect of Sleep Duration, Diet, and Physical Activity on Obesity and Overweight Elementary School Students in Shanghai. J Sch Health, 2018. **88**(2): p. 112-121.
60. Zhao, Y., et al., Fast food consumption and its associations with obesity and hypertension among children: results from the baseline data of the Childhood Obesity Study in China Mega-cities. BMC Public Health, 2017. **17**(1): p. 933.
